# Supplementary material for: Associations of genetically predicted iron status with 24 gastrointestinal diseases and gut microbiota: a Mendelian randomization study
Source: Front Genet. 2024 Aug 7;15:1406230. doi: 10.3389/fgene.2024.1406230 (PMC11335489; doi:10.3389/fgene.2024.1406230)
Supplement: Supplementary file 1 [file DataSheet1.xlsx]

## Sheet: Index
Associations of genetically predicted iron status with 24 gastrointestinal diseases and gut microbiota: a Mendelian randomization study
Table S1. Information of included studies and consortia
Table S2. Definitions of gastrointestinal diseases in UK Biobank and FinnGen
Table S3. Single nucleotide polymorphisms used as instrumental variables
Table S4. False discovery rate adjusted p values for all tested associations
Table S5. Associations of genetically-predicted iron with gastrointestinal diseases in univaribale Mendelian randomization using different methods
Table S6. Associations of genetically-predicted ferritin with gastrointestinal diseases in univaribale Mendelian randomization using different methods
Table S7. Associations of genetically-predicted transferrin saturation with gastrointestinal diseases in univaribale Mendelian randomization using different methods
Table S8. Associations of genetically-predicted transferrin with gastrointestinal diseases in univaribale Mendelian randomization using different methods
Table S9. Associations of genetically-predicted spleen iron concent with gastrointestinal diseases in univaribale Mendelian randomization using different methods
Table S10. Associations of genetically-predicted liver iron content with gastrointestinal diseases in univaribale Mendelian randomization using different methods
Table S11. Associations of genetically-predicted pancreas iron content with gastrointestinal diseases in univaribale Mendelian randomization using different methods
Table S12. Associations of genetically-predicted iron deficiency anemia with gastrointestinal diseases in univaribale Mendelian randomization using different methods
Table S13-15. Associations of genetically-predicted iron status with inflammatory bowel disease/Crohn's disease/ulcerative colitis in univariable mendelian randomization using different methods
Table S16. Associations of genetically-predicted iron status with gastrointestinal diseases in multivariate Mendelian randomization using different methods
Table S17. Associations of genetically-predicted iron with gut microbiota in univaribale Mendelian randomization using inverse variance weighted
Table S18. Associations of genetically-predicted ferritin with gut microbiota in univaribale Mendelian randomization using inverse variance weighted
Table S19. Associations of genetically-predicted iron status with gastrointestinal diseases excluding SNP rs1800562 in univaribale Mendelian randomization using different methods
Table S20. Associations of genetically-predicted iron with gastrointestinal diseases in univaribale Mendelian randomization using different methods (Secondary Aanlysis)
Table S21. Associations of genetically-predicted ferritin with gastrointestinal diseases in univaribale Mendelian randomization using different methods (Secondary Aanlysis)
Table S22. Associations of genetically-predicted transferrin saturation with gastrointestinal diseases in univaribale Mendelian randomization using different methods (Secondary Aanlysis)
Table S23. Associations of genetically-predicted transferrin with gastrointestinal diseases in univaribale Mendelian randomization using different methods (Secondary Aanlysis)
Table S24. Associations of genetically-predicted iron and ferritin with gastrointestinal diseases in two-step Mendelian randomization

## Sheet: Table S1
	Table S1. Information of included studies and consortia
	Exposure/Outcome	Consortium/First author	Participants	Download URL
	Iron	Genetics of Iron Status Consortium	23,986 European-ancestry individuals	https://gwas.mrcieu.ac.uk/datasets/ieu-a-1049/
	Ferritin	Genetics of Iron Status Consortium	23,986 European-ancestry individuals	https://gwas.mrcieu.ac.uk/datasets/ieu-a-1050/
	Transferrin Saturation	Genetics of Iron Status Consortium	23,986 European-ancestry individuals	https://gwas.mrcieu.ac.uk/datasets/ieu-a-1051/
	Transferrin	Genetics of Iron Status Consortium	23,986 European-ancestry individuals	https://gwas.mrcieu.ac.uk/datasets/ieu-a-1052/
	Spleen iron content	Sorokin EP	35,324 European-ancestry individuals	https://gwas.mrcieu.ac.uk/datasets/ebi-a-GCST90101831/
	Liver iron content	Liu Y	32,858 European-ancestry individuals	https://gwas.mrcieu.ac.uk/datasets/ebi-a-GCST90016674/
	Pancreas iron content	Liu Y	25,617 European-ancestry individuals	https://gwas.mrcieu.ac.uk/datasets/ebi-a-GCST90016676/
	Iron deficiency anemia	Guindo-Martínez M	2,439 European ancestry cases, 54,198 European ancestry controls	https://www.ebi.ac.uk/gwas/
	Gatrointestinal diseases	The Finngen study	more than 250,000 European-ancestry individuals	r9.finngen.fi
	Gatrointestinal diseases	The UK Biobank study	more than 300,000 European-ancestry individuals	https://www.ebi.ac.uk/gwas/
	Cigarettes per day	GWAS and Sequencing Consortium of Alcohol and Nicotine use	337,334 European-ancestry individuals	https://gwas.mrcieu.ac.uk/datasets/ieu-b-25/
	Alcoholic drinks per week	GWAS and Sequencing Consortium of Alcohol and Nicotine use	335,394 European-ancestry individuals	https://gwas.mrcieu.ac.uk/datasets/ieu-b-73/
	Iron	Dennis JK	15,335 European-ancestry individuals	https://www.ebi.ac.uk/gwas/
	Ferritin	Dennis JK	16,215 European-ancestry individuals	https://www.ebi.ac.uk/gwas/
	Gut microbiota abundance	Kurilshikov A	14,306 European-ancestry individuals	https://mibiogen.gcc.rug.nl/
	Crohn's disease	The International Inflammatory Bowel Disease Genetics Consortium (IIBDGC)	5,956 European-ancestry cases and 14,927 European-ancestry controls	https://gwas.mrcieu.ac.uk/datasets/ieu-a-30/
	Crohn's disease	Katrina M de Lange	12,194 European-ancestry cases and 28,072 European-ancestry controls	https://gwas.mrcieu.ac.uk/datasets/ebi-a-GCST004132/
	Ulcerative colitis	The International Inflammatory Bowel Disease Genetics Consortium (IIBDGC)	6,968 European-ancestry cases and 20,464 European-ancestry controls	6,968 European-ancestry cases and 20,464 European-ancestry controls
	Ulcerative colitis	Katrina M de Lange	12,366 European-ancestry cases and 33,609 European-ancestry controls	https://gwas.mrcieu.ac.uk/datasets/ieu-a-32/

## Sheet: Table S2
	Table S2. Definitions of gastrointestinal diseases in UK Biobank and FinnGen
	Gastrointestinal diseases	UK Biobank				FinnGen
		Cases	Controls	Samplesize		Cases	Controls	Samplesize
	Gastroesophageal reflux	32957	434296	467253		26184	320387	346571
	Esophageal cancer	998	475308	476306		566	287137	287703
	Gastric ulcer	6293	467985	474278		5935	320387	326322
	Duodenal ulcer	1484	454864	456348		3520	320387	323907
	Acute gastritis	1447	379860	381307		2370	320387	322757
	Chronic gastritis	3645	441451	445096		9570	320387	329957
	Gastric cancer	1029	475087	476116		1307	287137	288444
	Irritable bowel syndrome	11168	473430	484598		9323	301931	311254
	Celiac disease	2364	324,074	326438		3690	361055	364745
	Ulcerative colitis	2515	482083	484598		5034	371530	376564
	Crohn's disease	1342	455006	456348		2007	359927	361934
	Diverticular disease	5218	479380	484598		30649	301931	332580
	Colorectal cancer	6581	463421	470002		6509	287137	293646
	Non-alcoholic fatty liver disease	4761	373227	377988		2275	375002	377277
	Alcoholic liver disease	1044	419487	420531		2761	366450	369211
	Cirrhosis	240	456108	456,348		3970	373307	377277
	Liver cancer	379	475259	475638		1081	287137	288218
	Cholangitis	359	455989	456348		1715	330903	332618
	Cholelithiasis	26122	461431	487553		37041	330903	367944
	Chlocystitis	9820	461431	471251		4299	330903	335202
	Acute pancreatitis	3798	476104	479902		6223	330903	337126
	Chronic pancreatitis	1424	476104	477528		3320	330903	334223
	Pancreatic cancer	1196	475049	476245		1416	287137	288553
	Acute appendicitis	2,588	453760	456348		28745	346283	375028

## Sheet: Table S3
	Table S3. Single nucleotide polymorphisms used as instrumental variables
	Trait	SNP	Chr	Position	EA	NEA	Beta	SE	F	P value
	Iron-GIS	rs12731	2	239087912	A	G	0.0473	0.01	22.3729	2.51501e-06
	Iron-GIS	rs1525892	3	133484712	A	G	0.0736	0.0104	50.0828	1.65082e-12
	Iron-GIS	rs6920211	6	135431318	C	T	0.0537	0.0115	21.8048	3.13798e-06
	Iron-GIS	rs1800562	6	26093141	A	G	0.3724	0.02	346.704	3.95913e-77
	Iron-GIS	rs1033478	6	56088216	C	T	-0.0551	0.0108	26.0289	3.62903e-07
	Iron-GIS	rs2075672	7	100240296	G	A	0.0557	0.0103	29.2439	5.94703e-08
	Iron-GIS	rs604302	8	37004569	C	T	-0.0577	0.0124	21.6525	3.07199e-06
	Iron-GIS	rs7172337	15	61767743	C	T	0.0523	0.0111	22.2002	2.63099e-06
	Iron-GIS	rs7209063	17	1892031	G	C	-0.0483	0.0104	21.5689	3.61002e-06
	Iron-GIS	rs13038647	20	48974248	C	T	0.0463	0.01	21.4369	3.80496e-06
	Iron-GIS	rs855791	22	37462936	G	A	0.1868	0.0101	342.067	4.31221e-77
	Ferritin-GIS	rs12693541	2	190418690	T	C	-0.106	0.014	57.3265	4.17734e-14
	Ferritin-GIS	rs7603193	2	60478727	T	C	-0.129	0.0267	23.343	1.38299e-06
	Ferritin-GIS	rs4376025	3	3419984	T	C	0.0463	0.01	21.4369	3.62001e-06
	Ferritin-GIS	rs173780	5	60903201	A	G	-0.0679	0.0146	21.6289	3.34804e-06
	Ferritin-GIS	rs1800562	6	26093141	A	G	0.211	0.0187	127.316	1.42495e-29
	Ferritin-GIS	rs9322487	6	155255431	A	G	0.0848	0.0183	21.4728	3.472e-06
	Ferritin-GIS	rs651007	9	136153875	T	C	-0.0597	0.0116	26.487	2.54097e-07
	Ferritin-GIS	rs1752162	9	126551037	T	C	0.061	0.0133	21.0357	4.80098e-06
	Ferritin-GIS	rs7395347	11	9152463	T	C	0.0452	0.0097	21.7137	3.19698e-06
	Ferritin-GIS	rs1050045	12	58115271	C	T	-0.0431	0.0094	21.0232	4.12098e-06
	Ferritin-GIS	rs16976620	15	45249892	A	G	-0.0811	0.0161	25.3741	4.52002e-07
	Ferritin-GIS	rs2645490	17	57878509	A	G	-0.0496	0.0108	21.0919	4.14105e-06
	Ferritin-GIS	rs368243	17	56708979	C	T	-0.0512	0.0093	30.3092	3.79997e-08
	Ferritin-GIS	rs2413450	22	37470224	C	T	0.0559	0.0095	34.6239	3.56697e-09
	Iron-GWAS	rs1852306	2	174334631	C	T	0.0845409	0.0163594	26.7054	2.36955e-07
	Iron-GWAS	rs114719295	5	1354281	A	C	0.330624	0.0641307	26.5789	2.52984e-07
	Iron-GWAS	rs1800562	6	26093141	A	G	0.1948	0.0215385	81.7988	1.50624e-19
	Iron-GWAS	rs7843737	8	128088066	A	G	0.0565694	0.0118403	22.8264	1.77306e-06
	Iron-GWAS	rs79195962	12	24543293	T	C	0.170846	0.035421	23.2642	1.41214e-06
	Iron-GWAS	rs12605411	18	5693934	C	A	-0.0806245	0.0169001	22.7591	1.83625e-06
	Iron-GWAS	rs11152176	18	57442660	T	C	-0.0519444	0.0113679	20.8794	4.89094e-06
	Iron-GWAS	rs2413450	22	37470224	T	C	-0.120034	0.0109597	119.953	6.47708e-28
	Ferritin-GWAS	rs13094666	3	56703746	C	A	0.0494907	0.010596	21.8154	3.00204e-06
	Ferritin-GWAS	rs62307994	4	79829028	C	G	0.11268	0.0246048	20.9727	4.65852e-06
	Ferritin-GWAS	rs72803737	5	130438648	G	T	0.0544667	0.0117878	21.3499	3.82605e-06
	Ferritin-GWAS	rs6601515	8	10603399	C	T	0.0673696	0.0129673	26.9916	2.04326e-07
	Ferritin-GWAS	rs2128202	8	73103845	T	A	-0.0575289	0.0122825	21.9381	2.81579e-06
	Ferritin-GWAS	rs11851875	14	98992515	C	T	-0.0839882	0.0180336	21.6906	3.20357e-06
	Ferritin-GWAS	rs117055613	15	45375226	A	G	-0.132582	0.0253742	27.3014	1.74094e-07
	Ferritin-GWAS	rs170775	17	4386500	A	G	0.0677689	0.0141268	23.013	1.60904e-06
	Ferritin-GWAS	rs17690703	17	43925297	T	C	-0.0602153	0.0109462	30.2613	3.77579e-08
	Transferrin Saturation	rs8177272	3	133482870	A	G	-0.097	0.0106	83.7398	5.52332e-20
	Transferrin Saturation	rs2061336	3	164591618	G	A	0.0929	0.0179	26.9355	1.98999e-07
	Transferrin Saturation	rs9990333	3	195827205	T	C	0.0488	0.0099	24.2979	7.37293e-07
	Transferrin Saturation	rs806970	6	26141375	T	C	-0.0977	0.0197	24.5956	6.92596e-07
	Transferrin Saturation	rs2235233	6	27279852	C	T	-0.069	0.0129	28.6101	8.80501e-08
	Transferrin Saturation	rs9389269	6	135427159	C	T	0.0549	0.0112	24.0275	9.78093e-07
	Transferrin Saturation	rs1800562	6	26093141	A	G	0.5772	0.0203	808.464	1.52055e-178
	Transferrin Saturation	rs2841000	6	56077917	T	C	-0.0507	0.0108	22.0378	2.77799e-06
	Transferrin Saturation	rs221834	7	100343175	G	C	0.1226	0.0205	35.7662	2.377e-09
	Transferrin Saturation	rs604302	8	37004569	C	T	-0.0579	0.0124	21.8029	3.25799e-06
	Transferrin Saturation	rs11046313	12	22274788	A	C	-0.0561	0.0113	24.6473	6.85693e-07
	Transferrin Saturation	rs4790859	17	1897820	G	A	-0.0483	0.0102	22.423	2.28702e-06
	Transferrin Saturation	rs855791	22	37462936	G	A	0.1921	0.0101	361.753	3.50429e-80
	Transferrin	rs946526	1	46487168	C	T	0.122	0.0261	21.8494	2.97598e-06
	Transferrin	rs11680788	2	33059096	T	C	-0.1151	0.0251	21.0283	4.57204e-06
	Transferrin	rs744653	2	190378750	T	C	0.0916	0.0144	40.4637	2e-10
	Transferrin	rs7616492	3	133654846	A	G	-0.0485	0.0105	21.3356	4.01597e-06
	Transferrin	rs17376530	3	133555155	T	C	-0.1881	0.0165	129.96	5.43125e-30
	Transferrin	rs3811658	3	133476852	T	C	0.3883	0.0109	1269.06	1e-200
	Transferrin	rs10935059	3	133132496	T	G	-0.1568	0.033	22.5769	2.01902e-06
	Transferrin	rs9990333	3	195827205	T	C	-0.067	0.0101	44.0055	3.01093e-11
	Transferrin	rs1865383	4	73110424	T	G	-0.052	0.011	22.3471	2.171e-06
	Transferrin	rs10055024	5	11149808	T	C	0.0513	0.0104	24.3315	8.97594e-07
	Transferrin	rs1800562	6	26093141	A	G	-0.5496	0.0208	698.179	1.25893e-153
	Transferrin	rs9268633	6	32406473	G	A	0.0717	0.0128	31.3775	2.31398e-08
	Transferrin	rs1110446	6	30070937	T	C	0.0563	0.0122	21.296	4.176e-06
	Transferrin	rs4291160	7	11974451	G	T	0.0548	0.0118	21.5674	3.67697e-06
	Transferrin	rs1495741	8	18272881	A	G	0.0825	0.0122	45.7286	1.57398e-11
	Transferrin	rs1354342	8	107200980	G	A	-0.1264	0.0239	27.9704	1.28301e-07
	Transferrin	rs2165554	9	119479774	T	C	-0.0483	0.0105	21.16	4.19102e-06
	Transferrin	rs6486121	11	13355770	T	C	-0.0561	0.0105	28.5461	1.03999e-07
	Transferrin	rs174577	11	61604814	A	C	0.0684	0.0107	40.8644	1.89701e-10
	Transferrin	rs2374503	12	106034829	C	G	-0.0482	0.0103	21.8988	2.947e-06
	Transferrin	rs12371237	12	29831076	A	C	-0.0498	0.0107	21.6616	3.48201e-06
	Transferrin	rs12978009	19	17113634	A	G	-0.0642	0.0138	21.6427	3.16599e-06
	Transferrin	rs2275901	22	19135603	A	G	0.0601	0.0126	22.7514	1.76701e-06
	Spleen iron content	rs2185602	1	58053154	T	A	-0.0434045	0.00893055	23.6218	1.2e-06
	Spleen iron content	rs2022003	1	158586966	T	A	-0.093757	0.00877597	114.135	1.20005e-26
	Spleen iron content	rs137939378	2	228459775	A	G	0.155828	0.0325306	22.946	1.7e-06
	Spleen iron content	rs11568351	2	190445194	C	G	-0.060439	0.00949314	40.5336	1.89998e-10
	Spleen iron content	rs115697725	2	23903541	G	C	0.0726761	0.0113503	40.9986	1.5e-10
	Spleen iron content	rs62256243	3	55163321	T	C	0.0388817	0.00831928	21.8433	2.99999e-06
	Spleen iron content	rs147699550	3	195814315	G	A	-0.0451464	0.00924692	23.837	1e-06
	Spleen iron content	rs187050905	6	31975259	A	G	-0.146239	0.0308002	22.5434	2.1e-06
	Spleen iron content	rs12208637	6	108694389	A	G	-0.0396858	0.0080175	24.5015	7.39997e-07
	Spleen iron content	rs116893930	7	81545906	T	C	0.108811	0.0234107	21.6031	3.40001e-06
	Spleen iron content	rs4259389	8	98033794	C	T	0.0384762	0.00828297	21.578	3.40001e-06
	Spleen iron content	rs4737010	8	41630447	A	G	-0.0680393	0.0094177	52.1951	5.00035e-13
	Spleen iron content	rs10993916	9	136941117	C	T	0.0402377	0.0086214	21.7826	3.09999e-06
	Spleen iron content	rs147707926	9	115914583	T	C	0.196358	0.0306121	41.1444	1.40001e-10
	Spleen iron content	rs143102883	11	11659086	T	C	0.130791	0.0273595	22.8528	1.7e-06
	Spleen iron content	rs2233243	11	60152482	G	A	0.0867954	0.0087132	99.2289	2.19989e-23
	Spleen iron content	rs927924	13	40985468	A	C	-0.0431045	0.00810475	28.2856	1e-07
	Spleen iron content	rs3759577	14	103850963	T	C	0.0503659	0.00948609	28.1902	1.09999e-07
	Spleen iron content	rs7183950	15	97787144	C	T	-0.0401688	0.00798478	25.3076	4.90004e-07
	Spleen iron content	rs7216042	17	9935429	G	A	-0.0595504	0.0124961	22.7102	1.89998e-06
	Spleen iron content	rs9906807	17	42303305	T	C	0.0391901	0.00835927	21.9794	2.80001e-06
	Spleen iron content	rs34523089	17	56436109	T	C	0.0624716	0.0108333	33.254	8.10009e-09
	Spleen iron content	rs872629	19	52130638	A	C	-0.0599827	0.0124836	23.0873	1.5e-06
	Liver iron content	rs5022282	1	241338314	T	C	0.0369255	0.008029	21.1509	4.20001e-06
	Liver iron content	rs115380467	2	190407500	A	G	0.163174	0.0258952	39.7067	2.99999e-10
	Liver iron content	rs79944047	2	115752853	G	A	0.0876785	0.0176187	24.765	6.49995e-07
	Liver iron content	rs12712871	2	43170738	G	A	0.0381243	0.0077894	23.955	9.90011e-07
	Liver iron content	rs7577758	2	190518610	T	C	0.0606348	0.0091617	43.8018	3.59998e-11
	Liver iron content	rs13420683	2	98336352	A	C	-0.0400139	0.00850024	22.1595	2.5e-06
	Liver iron content	rs148663143	3	138089065	A	G	0.131239	0.0284696	21.2502	4e-06
	Liver iron content	rs6828539	4	31065735	T	C	-0.035345	0.00771669	20.9794	4.60002e-06
	Liver iron content	rs77060114	4	157702081	A	G	0.157756	0.0314566	25.1506	5.30005e-07
	Liver iron content	rs78070117	6	25971279	T	A	-0.165678	0.0347205	22.7697	1.79999e-06
	Liver iron content	rs2237227	6	26104895	A	C	-0.0862456	0.0171484	25.2945	4.90004e-07
	Liver iron content	rs79100946	6	26347853	C	T	0.229806	0.0268378	73.3211	1.10002e-17
	Liver iron content	rs80215559	6	25918225	C	T	0.549155	0.0145254	1429.33	1e-200
	Liver iron content	rs1794269	6	32673894	T	C	-0.0521617	0.0078846	43.7667	3.69999e-11
	Liver iron content	rs12206204	6	26116982	T	C	0.145661	0.0295312	24.329	8.09991e-07
	Liver iron content	rs1524403	7	54236602	T	A	-0.0703436	0.0149328	22.1905	2.5e-06
	Liver iron content	rs11188589	10	82910671	T	C	-0.0421515	0.00872625	23.333	1.40001e-06
	Liver iron content	rs7978243	12	66296825	T	G	0.0905839	0.0184874	24.0077	9.59997e-07
	Liver iron content	rs112429249	15	40536400	T	C	0.123471	0.0263156	22.0142	2.69998e-06
	Liver iron content	rs77507466	16	2116398	C	T	0.0897794	0.0194521	21.302	3.89996e-06
	Liver iron content	rs9928804	16	81172383	G	A	-0.0790717	0.0167143	22.3803	2.19999e-06
	Liver iron content	rs118135482	17	80531364	T	C	0.139677	0.0292206	22.8492	1.79999e-06
	Liver iron content	rs3746101	19	2050823	T	G	0.067161	0.014638	21.0509	4.49997e-06
	Liver iron content	rs12482329	21	16235675	C	T	0.0654872	0.0128959	25.7875	3.79997e-07
	Liver iron content	rs9616598	22	49786587	A	C	-0.0365203	0.00798581	20.9137	4.79999e-06
	Liver iron content	rs855791	22	37462936	G	A	0.0900707	0.00780504	133.173	8.30042e-31
	Pancreas iron content	rs1475268	1	51921617	A	T	0.0878131	0.0186498	22.1702	2.5e-06
	Pancreas iron content	rs112618477	2	5864697	A	G	0.165888	0.0358596	21.4003	3.69999e-06
	Pancreas iron content	rs77966069	4	162297490	C	G	0.177893	0.0331358	28.8219	7.90005e-08
	Pancreas iron content	rs72660337	4	75740054	C	A	0.121586	0.0249755	23.6995	1.09999e-06
	Pancreas iron content	rs2745356	6	127399589	T	G	-0.0463089	0.00945968	23.9649	9.80009e-07
	Pancreas iron content	rs62451950	7	13785837	G	A	0.107618	0.0231674	21.5782	3.40001e-06
	Pancreas iron content	rs182314741	7	97532532	A	T	0.0876315	0.0183335	22.847	1.79999e-06
	Pancreas iron content	rs12676584	8	129547378	A	G	-0.0520957	0.00942374	30.5603	3.2e-08
	Pancreas iron content	rs62513479	8	58165366	C	T	0.0870475	0.0181327	23.0456	1.6e-06
	Pancreas iron content	rs41277803	9	109346616	T	A	0.105437	0.0226938	21.586	3.40001e-06
	Pancreas iron content	rs16936441	9	18211655	A	G	-0.0504724	0.0107823	21.9122	2.90001e-06
	Pancreas iron content	rs79929264	9	29907360	T	C	0.188982	0.036672	26.5566	2.59998e-07
	Pancreas iron content	rs4941731	13	33568060	G	A	-0.0495153	0.0107524	21.2065	4.09996e-06
	Pancreas iron content	rs200936531	13	23565836	G	A	-0.0480016	0.00998076	23.1305	1.5e-06
	Pancreas iron content	rs149892266	14	36718371	A	G	0.211141	0.0456407	21.4013	3.69999e-06
	Pancreas iron content	rs76827115	14	44359037	A	G	0.145432	0.030323	23.0025	1.6e-06
	Pancreas iron content	rs12592197	15	41204165	G	A	0.0629823	0.0136951	21.1498	4.20001e-06
	Pancreas iron content	rs61994486	15	26251398	C	T	0.060173	0.0126906	22.4822	2.1e-06
	Pancreas iron content	rs533581	16	88967437	C	T	0.0476425	0.00885239	28.9646	7.39997e-08
	Pancreas iron content	rs11640116	16	20150140	A	G	0.0469443	0.0100516	21.812	2.99999e-06
	Pancreas iron content	rs11657135	17	53354274	G	A	0.0488684	0.00975604	25.0905	5.49997e-07
	Pancreas iron content	rs144023377	17	71257658	T	G	0.101653	0.0212203	22.9476	1.7e-06
	Pancreas iron content	rs145300825	19	8787797	G	A	0.0567926	0.0120192	22.3271	2.30001e-06
	Pancreas iron content	rs77366227	19	33815401	A	T	0.0540684	0.0104078	26.9879	2e-07
	Pancreas iron content	rs34189838	21	40341981	A	G	-0.05215	0.0113766	21.0128	4.60002e-06
	Iron deficiency anemia	rs11580090	1	85753325	A	G	-0.153148	0.0327311	21.8928	2.29318e-06
	Iron deficiency anemia	rs6670921	1	85755925	A	G	-0.164865	0.035743	21.2753	2.89314e-06
	Iron deficiency anemia	rs5776722	1	104834307	ATTTTTTTTTTTTTTTTTTTTTTTTTT	A	0.935049	0.239486	15.2443	4.87294e-06
	Iron deficiency anemia	rs74487187	10	80248738	A	G	0.522044	0.100759	26.844	1.60241e-06
	Iron deficiency anemia	rs80301409	10	80301739	A	G	0.537322	0.0993289	29.2629	5.79489e-07
	Iron deficiency anemia	rs142547215	10	111355551	C	A	0.720256	0.133552	29.0853	1.07024e-06
	Iron deficiency anemia	rs79552714	12	21653152	G	T	0.457616	0.0936453	23.8798	4.93506e-06
	Iron deficiency anemia	rs34565059	13	90118053	GTC	G	0.141734	0.0300914	22.1852	2.71433e-06
	Iron deficiency anemia	rs6145171	13	90154843	G	GCTGTAATCCGTGTTCTGATTTAAACTTGAGCTTTTTTCCCCC	-0.138046	0.0299894	21.1891	4.48291e-06
	Iron deficiency anemia	rs9555904	13	90161959	C	A	0.139083	0.0302259	21.1734	4.58624e-06
	Iron deficiency anemia	rs12874844	13	90172076	A	G	0.140265	0.0302954	21.4361	3.97792e-06
	Iron deficiency anemia	rs71480271	15	45321380	C	A	0.258651	0.0511568	25.5636	9.53839e-07
	Iron deficiency anemia	rs35142181	15	45323197	A	C	0.25686	0.0517404	24.6453	1.51274e-06
	Iron deficiency anemia	rs35769013	15	45327334	G	T	0.260711	0.0511686	25.9604	7.95157e-07
	Iron deficiency anemia	rs66662768	15	45329491	A	G	0.260818	0.0511699	25.9804	7.87787e-07
	Iron deficiency anemia	rs12902042	15	45331395	T	G	0.287727	0.0586622	24.0572	2.29651e-06
	Iron deficiency anemia	rs3874239	15	45331689	G	C	-0.209404	0.0446244	22.0204	4.54848e-06
	Iron deficiency anemia	rs7183802	15	45334386	A	T	0.261284	0.0511936	26.0492	7.6376e-07
	Iron deficiency anemia	rs7165595	15	45334928	C	A	0.211902	0.0449134	22.2596	4.086e-06
	Iron deficiency anemia	rs12903829	15	45335100	T	C	0.251874	0.0485345	26.9318	4.79011e-07
	Iron deficiency anemia	rs2470658	15	45344086	C	T	-0.215739	0.0454059	22.5753	3.55949e-06
	Iron deficiency anemia	rs12907366	15	45348089	T	C	0.319662	0.0635781	25.2794	1.71142e-06
	Iron deficiency anemia	rs35386632	15	45351861	T	A	0.263314	0.0523282	25.3207	1.12522e-06
	Iron deficiency anemia	rs35426906	15	45352034	T	C	0.259129	0.05245	24.4085	1.73434e-06
	Iron deficiency anemia	rs528379343	2	67462010	C	A	1.16293	0.210931	30.3967	3.57874e-06
	Iron deficiency anemia	rs190326440	20	43495544	C	G	-0.909762	0.234239	15.0847	4.63228e-06
	Iron deficiency anemia	rs2001781	3	6037848	A	G	-0.262889	0.057767	20.7102	2.43852e-06
	Iron deficiency anemia	rs2090353	3	6054073	A	C	-0.263258	0.0571965	21.1848	1.88851e-06
	Iron deficiency anemia	rs182016107	3	142592859	T	C	-1.18078	0.307125	14.7811	2.01428e-06
	Iron deficiency anemia	rs6870542	5	17003017	T	C	-0.342889	0.0664287	26.6438	7.72903e-07
	Iron deficiency anemia	rs6875390	5	17003312	A	G	0.344223	0.0665364	26.7646	7.33792e-07
	Iron deficiency anemia	rs35125801	5	17008021	AT	A	-0.23803	0.0500303	22.6359	3.77409e-06
	Iron deficiency anemia	rs11739645	5	17008082	A	G	0.349183	0.0674014	26.8391	7.23054e-07
	Iron deficiency anemia	rs111272500	5	17011329	CTTAA	C	-0.357725	0.0667562	28.7154	3.20509e-07
	Iron deficiency anemia	rs7713303	5	17012099	C	T	-0.352354	0.0672149	27.4807	5.5325e-07
	Iron deficiency anemia	rs12655704	5	17013173	T	C	-0.354522	0.0673259	27.7282	4.99662e-07
	Iron deficiency anemia	rs114752624	5	17016605	A	G	0.366757	0.0676164	29.4207	2.39952e-07
	Iron deficiency anemia	rs75714224	5	17016691	C	T	0.366427	0.0676169	29.3673	2.45798e-07
	Iron deficiency anemia	rs34748407	5	17023992	A	G	-0.206196	0.0423302	23.7279	1.83464e-06
	Iron deficiency anemia	rs3853209	5	95834313	A	G	-0.199465	0.0446786	19.9312	4.88831e-06
	Iron deficiency anemia	rs75081018	5	166784585	C	A	-0.551172	0.120631	20.8764	6.37668e-07
	Iron deficiency anemia	rs143962509	7	20480811	T	G	1.16257	0.210054	30.6321	2.82807e-06
	Iron deficiency anemia	rs79798837	7	67292424	T	C	-0.261397	0.0518384	25.4272	1.69491e-07
	Chr, chromosome; EA, effect allele; NEA, non-effect allele; SE, standard error; GIS, Genetics of Iron Status Consortium; GWAS, datasets of Dennis JK et al, PubMed ID: 33441150.

## Sheet: Table S4
	Table S4. False discovery rate adjusted p values for all tested associations
	Gastrointestinal diseases	Iron				Ferritin				Transferrin Saturation				Transferrin				Spleen iron content				Liver iron content				Pancreas iron content				Iron deficiency anemia
		Original P value	Benjamini-Hochberg adjusted P value	Significant using an FDR of 0.05?		Original P value	Benjamini-Hochberg adjusted P value	Significant using an FDR of 0.05?		Original P value	Benjamini-Hochberg adjusted P value	Significant using an FDR of 0.05?		Original P value	Benjamini-Hochberg adjusted P value	Significant using an FDR of 0.05?		Original P value	Benjamini-Hochberg adjusted P value	Significant using an FDR of 0.05?		Original P value	Benjamini-Hochberg adjusted P value	Significant using an FDR of 0.05?		Original P value	Benjamini-Hochberg adjusted P value	Significant using an FDR of 0.05?		Original P value	Benjamini-Hochberg adjusted P value	Significant using an FDR of 0.05?
	Gas+B5:W29troesophageal reflux	0.281325	0.666115	No		0.0843987	0.506392	No		0.0996791	0.341757	No		0.785227	0.785227	No		0.101779	0.476474	No		0.412803	0.863867	No		0.500744	0.984247	No		0.615992	0.917003	No
	Esophageal cancer	0.679001	0.818796	No		0.383706	0.837176	No		0.0246883	0.14813	No		0.108662	0.763061	No		0.577832	0.815762	No		0.864045	0.988569	No		0.923398	0.984247	No		0.0160566	0.128453	No
	Gastric ulcer	0.906837	0.946264	No		0.971639	0.999505	No		0.812514	0.81807	No		0.72248	0.776109	No		0.961088	0.961088	No		0.732023	0.984146	No		0.581318	0.984247	No		0.367717	0.855978	No
	Duodenal ulcer	0.720063	0.822929	No		0.999505	0.999505	No		0.508976	0.689153	No		0.615984	0.776109	No		0.295929	0.546331	No		0.73811	0.984146	No		0.647947	0.984247	No		0.513333	0.88	No
	Acute gastritis	0.115732	0.39999	No		0.59278	0.938352	No		0.370891	0.684722	No		0.459807	0.763061	No		0.891318	0.930071	No		0.480794	0.863867	No		0.0660349	0.984247	No		0.799979	0.928226	No
	Chronic gastritis	0.116664	0.39999	No		0.236591	0.709773	No		0.448328	0.689153	No		0.707198	0.776109	No		0.522844	0.784266	No		0.0584298	0.338433	No		0.248585	0.984247	No		0.746816	0.928226	No
	Gastric cancer	0.240752	0.645529	No		0.631776	0.938352	No		0.19796	0.527893	No		0.170584	0.763061	No		0.423421	0.677473	No		0.247934	0.693155	No		0.500016	0.984247	No		0.0107245	0.128453	No
	Irritable bowel syndrome	0.0320552	0.256441	No		0.361881	0.837176	No		0.233644	0.560746	No		0.572295	0.763061	No		0.261873	0.539561	No		0.201851	0.692062	No		0.795381	0.984247	No		0.276062	0.736164	No
	Celiac disease	0.433565	0.743255	No		0.359283	0.837176	No		8.24705e-05	0.00137658	Yes		0.15624	0.763061	No		0.0454289	0.476474	No		0.971007	1	No		0.948802	0.984247	No		0.640524	0.917003	No
	Diverticular disease	0.68233	0.818796	No		0.536768	0.938352	No		0.81807	0.81807	No		0.376961	0.763061	No		0.863915	0.930071	No		0.259933	0.693155	No		0.312184	0.984247	No		0.265317	0.736164	No
	Crohn's disease	0.0480668	0.288401	No		0.664666	0.938352	No		0.0455693	0.218733	No		0.743771	0.776109	No		0.194151	0.476474	No		0.0138382	0.110706	No		0.371556	0.984247	No		0.831364	0.928226	No
	Ulcerative colitis	1	1	No		0.0322746	0.347672	No		0.631154	0.721319	No		0.529079	0.763061	No		0.173554	0.476474	No		0.0846084	0.338433	No		0.937581	0.984247	No		0.254128	0.736164	No
	Colorectal cancer	0.100771	0.39999	No		0.043459	0.347672	No		0.292816	0.638872	No		0.474975	0.763061	No		0.170863	0.476474	No		0.345192	0.82846	No		0.815593	0.984247	No		0.0157557	0.128453	No
	Non-alcoholic fatty liver disease	0.335286	0.666115	No		0.722942	0.963923	No		0.000114715	0.00137658	Yes		0.00290323	0.0696776	No		0.661247	0.818957	No		0.00182777	0.0219332	Yes		0.766014	0.984247	No		0.687752	0.917003	No
	Alcoholic liver disease	0.871574	0.946264	No		0.874784	0.999505	No		0.494163	0.689153	No		0.161087	0.763061	No		0.0994739	0.476474	No		0.490588	0.863867	No		0.819668	0.984247	No		0.651159	0.917003	No
	Cirrhosis	0.339473	0.666115	No		0.214201	0.709773	No		0.346969	0.684722	No		0.340422	0.763061	No		0.143206	0.476474	No		0.570058	0.912093	No		0.3489	0.984247	No		0.850874	0.928226	No
	Liver cancer	0.000610696	0.0146567	Yes		1.40084e-75	3.36202e-74	Yes		0.000271855	0.00217484	Yes		0.721877	0.776109	No		0.685345	0.818957	No		6.78989e-18	1.62957e-16	Yes		0.209797	0.984247	No		0.0978739	0.469795	No
	Cholangitis	0.515912	0.752089	No		0.906356	0.999505	No		0.409047	0.689153	No		0.493521	0.763061	No		0.26978	0.539561	No		0.875216	0.988569	No		0.82994	0.984247	No		0.952461	0.984197	No
	Cholecystitis	0.242073	0.645529	No		0.905358	0.999505	No		0.162083	0.486248	No		0.427111	0.763061	No		0.111731	0.476474	No		0.503922	0.863867	No		0.187747	0.984247	No		0.211554	0.736164	No
	Cholelithiasis	0.532729	0.752089	No		0.950615	0.999505	No		0.6084	0.721319	No		0.409658	0.763061	No		0.702762	0.818957	No		0.906188	0.988569	No		0.984247	0.984247	No		0.984197	0.984197	No
	Acute pancreatitis	0.515588	0.752089	No		0.158328	0.709773	No		0.545579	0.689153	No		0.494747	0.763061	No		0.716587	0.818957	No		0.651897	0.977845	No		0.227559	0.984247	No		0.0818213	0.469795	No
	Chronic pancreatitis	0.031635	0.256441	No		0.231848	0.709773	No		0.0675988	0.270395	No		0.290456	0.763061	No		0.198531	0.476474	No		0.0765528	0.338433	No		0.223387	0.984247	No		0.448712	0.855978	No
	Pancreatic cancer	0.360812	0.666115	No		0.52175	0.938352	No		0.525994	0.689153	No		0.290347	0.763061	No		0.00163737	0.0392968	Yes		0.823272	0.988569	No		0.550102	0.984247	No		0.463655	0.855978	No
	Acute appendicitis	0.639019	0.818796	No		0.564801	0.938352	No		0.727226	0.793337	No		0.567666	0.763061	No		0.401681	0.677473	No		1	1	No		0.646865	0.984247	No		0.405753	0.855978	No

## Sheet: Table S5
	Table S5. Associations of genetically-predicted iron with gastrointestinal diseases in univaribale Mendelian randomization using different methods*
	Disease	Source	Number of used SNPs		IVW				Weighted median			MR-Egger				MR-PRESSO†
				Cochran's Q	Cochran's Q P value	OR (95%CI)	P value		OR (95%CI)	P value		OR (95%CI)	P value	P intercept		Global test	Outliers	OR (95%CI)	P value	Distortion test
	Gastroesophageal reflux	UK Biobank	10	11.759	0.227237	1.03 (0.96 - 1.09)	0.412001		1.04 (0.97 - 1.11)	0.329688		1.07 (0.97 - 1.18)	0.213018	0.314839		0.324667	NA	NA	NA	NA
	Gastroesophageal reflux	FinnGen	10	4.23646	0.895171	1.02 (0.96 - 1.09)	0.495583		1.04 (0.95 - 1.13)	0.392173		1.04 (0.94 - 1.16)	0.454639	0.654337		0.913167	NA	NA	NA	NA
	Gastroesophageal reflux	Meta-analysis	NA	NA	NA	1.02 (0.98 - 1.07)	0.281325		1.04 (0.99 - 1.10)	0.148693		1.06 (0.98 - 1.13)	0.136616	NA		NA	NA	NA	NA	NA
	Esophageal cancer	UK Biobank	10	12.4289	0.190197	0.91 (0.71 - 1.18)	0.47794		0.84 (0.64 - 1.11)	0.217926		0.71 (0.48 - 1.04)	0.119884	0.148324		0.254167	NA	NA	NA	NA
	Esophageal cancer	FinnGen	10	3.81353	0.923251	1.10 (0.71 - 1.70)	0.677541		1.24 (0.73 - 2.10)	0.432751		1.06 (0.52 - 2.17)	0.875304	0.909393		0.917833	NA	NA	NA	NA
	Esophageal cancer	Meta-analysis	NA	NA	NA	0.95 (0.77 - 1.19)	0.679001		0.91 (0.72 - 1.17)	0.464224		0.78 (0.55 - 1.09)	0.146781	NA		NA	NA	NA	NA	NA
	Gastric ulcer	UK Biobank	10	16.3403	0.0601067	0.99 (0.89 - 1.10)	0.859578		0.97 (0.88 - 1.08)	0.611532		0.97 (0.80 - 1.18)	0.765895	0.802105		0.146333	NA	NA	NA	NA
	Gastric ulcer	FinnGen	10	3.38968	0.946825	1.03 (0.90 - 1.18)	0.685387		1.05 (0.88 - 1.25)	0.598097		0.96 (0.77 - 1.20)	0.754161	0.488099		0.906333	NA	NA	NA	NA
	Gastric ulcer	Meta-analysis	NA	NA	NA	1.00 (0.92 - 1.09)	0.906837		0.99 (0.91 - 1.08)	0.818919		0.97 (0.83 - 1.12)	0.639257	NA		NA	NA	NA	NA	NA
	Duodenal ulcer	UK Biobank	10	6.11756	0.728098	1.02 (0.81 - 1.29)	0.850067		1.01 (0.77 - 1.33)	0.94273		0.99 (0.69 - 1.41)	0.939656	0.796058		0.7945	NA	NA	NA	NA
	Duodenal ulcer	FinnGen	10	5.9732	0.742598	1.03 (0.86 - 1.23)	0.738277		1.03 (0.83 - 1.29)	0.780509		1.04 (0.78 - 1.39)	0.7726	0.908603		0.7985	NA	NA	NA	NA
	Duodenal ulcer	Meta-analysis	NA	NA	NA	1.03 (0.89 - 1.18)	0.720063		1.02 (0.86 - 1.21)	0.803119		1.02 (0.81 - 1.28)	0.86322	NA		NA	NA	NA	NA	NA
	Acute gastritis	UK Biobank	10	9.14646	0.423866	1.25 (0.98 - 1.59)	0.0672088		1.37 (1.03 - 1.80)	0.0277545		1.49 (1.03 - 2.14)	0.0645635	0.25116		0.517167	NA	NA	NA	NA
	Acute gastritis	FinnGen	10	13.2277	0.152569	1.05 (0.81 - 1.36)	0.726391		1.12 (0.86 - 1.45)	0.406001		1.18 (0.76 - 1.82)	0.479434	0.517958		0.254667	NA	NA	NA	NA
	Acute gastritis	Meta-analysis	NA	NA	NA	1.15 (0.97 - 1.38)	0.115732		1.23 (1.02 - 1.49)	0.0330525		1.35 (1.02 - 1.79)	0.0343464	NA		NA	NA	NA	NA	NA
	Chronic gastritis	UK Biobank	10	12.3481	0.194388	0.98 (0.82 - 1.19)	0.862019		1.11 (0.89 - 1.39)	0.362916		0.93 (0.67 - 1.28)	0.673551	0.682853		0.258833	NA	NA	NA	NA
	Chronic gastritis	FinnGen	10	9.27312	0.412455	0.91 (0.82 - 1.02)	0.103047		1.02 (0.88 - 1.19)	0.791533		0.95 (0.79 - 1.15)	0.620538	0.584648		0.360833	NA	NA	NA	NA
	Chronic gastritis	Meta-analysis	NA	NA	NA	0.93 (0.84 - 1.02)	0.116664		1.05 (0.92 - 1.19)	0.467004		0.94 (0.80 - 1.11)	0.49416	NA		NA	NA	NA	NA	NA
	Gastric cancer	UK Biobank	10	12.8382	0.170066	0.93 (0.80 - 1.08)	0.362484		0.88 (0.75 - 1.03)	0.104255		0.79 (0.61 - 1.03)	0.119707	0.185042		0.263667	NA	NA	NA	NA
	Gastric cancer	FinnGen	10	3.39824	0.946396	0.90 (0.67 - 1.19)	0.453793		0.89 (0.63 - 1.26)	0.507805		0.85 (0.53 - 1.36)	0.525692	0.803656		0.968833	NA	NA	NA	NA
	Gastric cancer	Meta-analysis	NA	NA	NA	0.92 (0.81 - 1.05)	0.240752		0.88 (0.76 - 1.02)	0.0871618		0.80 (0.64 - 1.01)	0.0614593	NA		NA	NA	NA	NA	NA
	Irritable bowel syndrome	UK Biobank	10	9.65145	0.379432	1.00 (1.00 - 1.00)	0.372777		1.00 (1.00 - 1.00)	0.907716		1.00 (1.00 - 1.00)	0.874814	0.620608		0.374833	NA	NA	NA	NA
	Irritable bowel syndrome	FinnGen	10	4.19616	0.898033	0.89 (0.80 - 0.99)	0.038688		0.88 (0.77 - 1.01)	0.0685865		0.87 (0.73 - 1.04)	0.166218	0.758246		0.9165	NA	NA	NA	NA
	Irritable bowel syndrome	Meta-analysis	NA	NA	NA	0.89 (0.80 - 0.99)	0.0320552		0.88 (0.77 - 1.01)	0.0647536		0.87 (0.73 - 1.04)	0.122974	NA		NA	NA	NA	NA	NA
	Celiac disease	UK Biobank	10	10.6692	0.299068	0.99 (0.98 - 1.00)	0.0266532		0.99 (0.98 - 1.00)	0.0315228		0.99 (0.98 - 1.00)	0.199501	0.919126		0.458667	NA	NA	NA	NA
	Celiac disease	FinnGen	10	7.75439	0.559075	0.87 (0.73 - 1.03)	0.114744		0.93 (0.75 - 1.17)	0.541672		0.84 (0.64 - 1.11)	0.25932	0.765467		0.561167	NA	NA	NA	NA
	Celiac disease	Meta-analysis	NA	NA	NA	0.96 (0.85 - 1.07)	0.433565		0.99 (0.98 - 1.00)	0.0480275		0.99 (0.98 - 1.00)	0.0461195	NA		NA	NA	NA	NA	NA
	Diverticular disease	UK Biobank	10	3.82143	0.922767	1.00 (1.00 - 1.00)	0.809288		1.00 (1.00 - 1.00)	0.87366		1.00 (1.00 - 1.00)	0.638799	0.67488		0.9435	NA	NA	NA	NA
	Diverticular disease	FinnGen	10	19.0408	0.0248482	0.98 (0.89 - 1.08)	0.681622		1.06 (0.96 - 1.16)	0.252046		1.09 (0.95 - 1.24)	0.246062	0.0864704		0.0756667	NA	NA	NA	NA
	Diverticular disease	Meta-analysis	NA	NA	NA	0.98 (0.89 - 1.08)	0.68233		1.06 (0.96 - 1.16)	0.227434		1.09 (0.95 - 1.24)	0.204777	NA		NA	NA	NA	NA	NA
	Crohn's disease	UK Biobank	10	6.28155	0.711442	1.33 (1.04 - 1.70)	0.023955		1.32 (0.98 - 1.76)	0.0638841		1.35 (0.92 - 1.96)	0.162969	0.935773		0.797667	NA	NA	NA	NA
	Crohn's disease	FinnGen	10	5.7208	0.767503	1.07 (0.85 - 1.35)	0.556827		1.11 (0.83 - 1.48)	0.470867		1.20 (0.82 - 1.75)	0.377562	0.488284		0.809833	NA	NA	NA	NA
	Crohn's disease	Meta-analysis	NA	NA	NA	1.19 (1.00 - 1.40)	0.0480668		1.21 (0.98 - 1.49)	0.0703834		1.27 (0.97 - 1.66)	0.0772273	NA		NA	NA	NA	NA	NA
	Ulcerative colitis	UK Biobank	10	10.1542	0.338147	1.00 (1.00 - 1.00)	0.35254		1.00 (1.00 - 1.00)	0.24526		1.00 (1.00 - 1.00)	0.352169	0.605662		0.481667	NA	NA	NA	NA
	Ulcerative colitis	FinnGen	10	11.731	0.228901	1.00 (0.85 - 1.19)	0.965531		1.07 (0.89 - 1.28)	0.459475		1.16 (0.89 - 1.51)	0.301509	0.209648		0.304833	NA	NA	NA	NA
	Ulcerative colitis	Meta-analysis	NA	NA	NA	1.00 (0.85 - 1.19)	1		1.07 (0.89 - 1.28)	0.465484		1.16 (0.89 - 1.51)	0.271086	NA		NA	NA	NA	NA	NA
	Colorectal cancer	UK Biobank	10	6.00699	0.739219	1.05 (0.96 - 1.15)	0.277718		1.03 (0.92 - 1.15)	0.593132		1.00 (0.87 - 1.16)	0.955896	0.474831		0.791167	NA	NA	NA	NA
	Colorectal cancer	FinnGen	10	17.4812	0.0416929	1.16 (0.96 - 1.39)	0.122014		1.13 (0.96 - 1.33)	0.13943		1.10 (0.80 - 1.50)	0.582263	0.685947		0.106	NA	NA	NA	NA
	Colorectal cancer	Meta-analysis	NA	NA	NA	1.07 (0.99 - 1.16)	0.100771		1.06 (0.97 - 1.16)	0.208179		1.02 (0.89 - 1.16)	0.804649	NA		NA	NA	NA	NA	NA
	Non-alcoholic fatty liver disease	UK Biobank	10	11.0803	0.270242	1.25 (1.09 - 1.44)	0.00190168		1.15 (0.94 - 1.40)	0.165963		1.34 (1.08 - 1.67)	0.0297732	0.427954		0.303333	NA	NA	NA	NA
	Non-alcoholic fatty liver disease	FinnGen	10	6.3773	0.701642	0.98 (0.79 - 1.22)	0.871986		1.05 (0.80 - 1.38)	0.735283		1.27 (0.89 - 1.81)	0.224119	0.11006		0.6875	NA	NA	NA	NA
	Non-alcoholic fatty liver disease	Meta-analysis	NA	NA	NA	1.12 (0.89 - 1.42)	0.335286		1.11 (0.95 - 1.31)	0.187682		1.32 (1.10 - 1.59)	0.00334926	NA		NA	NA	NA	NA	NA
	Alcoholic liver disease	UK Biobank	10	17.4925	0.04154	1.28 (0.87 - 1.88)	0.21404		1.37 (0.89 - 2.10)	0.156018		2.06 (1.32 - 3.22)	0.0131457	0.0240914		0.12	NA	NA	NA	NA
	Alcoholic liver disease	FinnGen	10	10.8076	0.289125	0.89 (0.72 - 1.11)	0.302869		0.85 (0.67 - 1.08)	0.187354		0.87 (0.59 - 1.26)	0.474003	0.850363		0.410833	NA	NA	NA	NA
	Alcoholic liver disease	Meta-analysis	NA	NA	NA	1.03 (0.73 - 1.46)	0.871574		1.04 (0.66 - 1.66)	0.860666		1.33 (0.57 - 3.09)	0.510687	NA		NA	NA	NA	NA	NA
	Cirrhosis	UK Biobank	10	20.5234	0.0149431	1.71 (0.70 - 4.17)	0.236967		2.72 (0.89 - 8.34)	0.0798879		2.28 (0.55 - 9.55)	0.290366	0.616709		0.1035	NA	NA	NA	NA
	Cirrhosis	FinnGen	10	7.8069	0.553717	1.07 (0.90 - 1.29)	0.411866		1.06 (0.83 - 1.35)	0.625899		0.96 (0.72 - 1.30)	0.817572	0.374901		0.613333	NA	NA	NA	NA
	Cirrhosis	Meta-analysis	NA	NA	NA	1.09 (0.91 - 1.30)	0.339473		1.44 (0.61 - 3.42)	0.408677		0.99 (0.74 - 1.33)	0.971468	NA		NA	NA	NA	NA	NA
	Liver cancer	UK Biobank	10	12.7429	0.174587	1.46 (1.11 - 1.92)	0.00685328		1.50 (1.14 - 1.97)	0.00388507		1.83 (1.12 - 2.99)	0.0413705	0.305195		0.2985	NA	NA	NA	NA
	Liver cancer	FinnGen	10	14.7206	0.0989014	1.53 (1.03 - 2.27)	0.0344317		1.36 (0.89 - 2.09)	0.159355		1.91 (1.01 - 3.61)	0.082245	0.408311		0.176333	NA	NA	NA	NA
	Liver cancer	Meta-analysis	NA	NA	NA	1.48 (1.18 - 1.86)	0.000610696		1.46 (1.16 - 1.84)	0.00133539		1.86 (1.26 - 2.74)	0.00176891	NA		NA	NA	NA	NA	NA
	Cholangitis	UK Biobank	10	7.57094	0.577894	1.26 (0.78 - 2.02)	0.345838		1.35 (0.76 - 2.39)	0.312503		1.84 (0.89 - 3.81)	0.139763	0.213393		0.577	NA	NA	NA	NA
	Cholangitis	FinnGen	10	7.13615	0.622947	1.03 (0.80 - 1.33)	0.803406		1.28 (0.91 - 1.80)	0.152171		1.18 (0.79 - 1.78)	0.442454	0.4302		0.526	NA	NA	NA	NA
	Cholangitis	Meta-analysis	NA	NA	NA	1.08 (0.86 - 1.35)	0.515912		1.30 (0.97 - 1.74)	0.0811119		1.31 (0.92 - 1.87)	0.133893	NA		NA	NA	NA	NA	NA
	Cholecystitis	UK Biobank	10	7.17165	0.619253	0.94 (0.86 - 1.03)	0.168385		0.93 (0.83 - 1.04)	0.212551		0.91 (0.79 - 1.05)	0.241176	0.628931		0.671	NA	NA	NA	NA
	Cholecystitis	FinnGen	10	15.8532	0.070012	1.02 (0.82 - 1.26)	0.878577		1.08 (0.88 - 1.31)	0.477049		1.16 (0.82 - 1.64)	0.420788	0.366063		0.147333	NA	NA	NA	NA
	Cholecystitis	Meta-analysis	NA	NA	NA	0.95 (0.88 - 1.03)	0.242073		0.96 (0.87 - 1.06)	0.469526		0.94 (0.83 - 1.07)	0.377043	NA		NA	NA	NA	NA	NA
	Cholelithiasis	UK Biobank	10	7.57245	0.577739	1.01 (0.95 - 1.07)	0.730417		1.00 (0.94 - 1.07)	0.941537		1.00 (0.91 - 1.10)	0.988788	0.778288		0.681	NA	NA	NA	NA
	Cholelithiasis	FinnGen	10	13.5842	0.137905	0.94 (0.87 - 1.01)	0.0748354		0.97 (0.90 - 1.06)	0.509441		0.97 (0.86 - 1.09)	0.643721	0.476714		0.217	NA	NA	NA	NA
	Cholelithiasis	Meta-analysis	NA	NA	NA	0.98 (0.91 - 1.05)	0.532729		0.99 (0.94 - 1.04)	0.650611		0.99 (0.92 - 1.06)	0.752959	NA		NA	NA	NA	NA	NA
	Acute pancreatitis	UK Biobank	10	11.7606	0.227145	1.06 (0.90 - 1.26)	0.468967		1.06 (0.88 - 1.29)	0.530102		1.12 (0.84 - 1.48)	0.462673	0.67532		0.314833	NA	NA	NA	NA
	Acute pancreatitis	FinnGen	10	8.31205	0.50303	1.02 (0.89 - 1.16)	0.773951		1.04 (0.88 - 1.24)	0.628081		1.06 (0.86 - 1.32)	0.594911	0.64456		0.565833	NA	NA	NA	NA
	Acute pancreatitis	Meta-analysis	NA	NA	NA	1.04 (0.93 - 1.15)	0.515588		1.05 (0.92 - 1.19)	0.463887		1.08 (0.91 - 1.28)	0.368996	NA		NA	NA	NA	NA	NA
	Chronic pancreatitis	UK Biobank	10	5.29115	0.808226	1.35 (1.06 - 1.71)	0.0136178		1.32 (0.98 - 1.79)	0.068367		1.27 (0.87 - 1.87)	0.253688	0.72609		0.873167	NA	NA	NA	NA
	Chronic pancreatitis	FinnGen	10	7.8069	0.553717	1.08 (0.90 - 1.29)	0.411866		1.06 (0.83 - 1.35)	0.627953		0.96 (0.72 - 1.30)	0.817572	0.374901		0.605833	NA	NA	NA	NA
	Chronic pancreatitis	Meta-analysis	NA	NA	NA	1.17 (1.01 - 1.35)	0.031635		1.16 (0.96 - 1.40)	0.13354		1.07 (0.84 - 1.35)	0.593348	NA		NA	NA	NA	NA	NA
	Pancreatic cancer	UK Biobank	10	18.2548	0.0323301	1.00 (0.71 - 1.42)	0.981257		1.08 (0.80 - 1.45)	0.611287		1.29 (0.75 - 2.22)	0.38385	0.280235		0.0803333	NA	NA	NA	NA
	Pancreatic cancer	FinnGen	10	16.7311	0.0530971	0.77 (0.53 - 1.13)	0.18336		0.83 (0.55 - 1.25)	0.372211		0.96 (0.51 - 1.79)	0.892138	0.4259		0.123833	NA	NA	NA	NA
	Pancreatic cancer	Meta-analysis	NA	NA	NA	0.89 (0.69 - 1.15)	0.360812		0.99 (0.78 - 1.26)	0.911537		1.14 (0.75, 1.71)	0.540153	NA		NA	NA	NA	NA	NA
	Acute appendicitis	UK Biobank	10	9.86642	0.361407	0.96 (0.80 - 1.16)	0.661387		0.98 (0.79 - 1.22)	0.873034		0.96 (0.71 - 1.29)	0.781084	0.981647		0.468667	NA	NA	NA	NA
	Acute appendicitis	FinnGen	10	15.3184	0.0825525	1.03 (0.95 - 1.12)	0.485611		1.03 (0.95 - 1.12)	0.475767		1.02 (0.89 - 1.18)	0.770745	0.899331		0.1795	NA	NA	NA	NA
	Acute appendicitis	Meta-analysis	NA	NA	NA	1.02 (0.94 - 1.10)	0.639019		1.02 (0.95, 1.11)	0.552741		1.01 (0.89 - 1.15)	0.893082	NA		NA	NA	NA	NA	NA
	OR, odd ratio; CI, condifence interval; IVW, inverse variance weighted; MR, Mendelian randomization; MR-PRESSO, Mendelian Randomization Pleiotropy RESidual Sum and Outlier;
	*Estimates with P<0.05 in IVW method are reported in bold.
	†Outlier-corrected estimate. NA, not available (if no outliers were detected).

## Sheet: Table S6
	Table S6. Associations of genetically-predicted ferritin with gastrointestinal diseases in univaribale Mendelian randomization using different methods*
	Disease	Source	Number of used SNPs		IVW				Weighted median			MR-Egger				MR-PRESSO†
				Cochran's Q	Cochran's Q P value	OR (95%CI)	P value		OR (95%CI)	P value		OR (95%CI)	P value	P intercept		Global test	Outliers	OR (95%CI)	P value	Distortion test
	Gastroesophageal reflux	UK Biobank	14	18.6606	0.13401	1.08 (0.98 - 1.18)	0.13167		1.10 (0.98 - 1.23)	0.105385		1.14 (0.92 - 1.42)	0.257549	0.563663		0.178833	NA	NA	NA	NA
	Gastroesophageal reflux	FinnGen	12	9.83357	0.545417	1.04 (0.95 - 1.15)	0.389872		1.01 (0.89 - 1.15)	0.866815		1.09 (0.87 - 1.37)	0.477886	0.683959		0.575333	NA	NA	NA	NA
	Gastroesophageal reflux	Meta-analysis	NA	NA	NA	1.06 (0.99 - 1.13)	0.0843987		1.06 (0.97 - 1.15)	0.183068		1.12 (0.95 - 1.31)	0.170843	NA		NA	NA	NA	NA	NA
	Esophageal cancer	UK Biobank	14	26.4069	0.0149837	1.19 (0.77 - 1.82)	0.433404		1.79 (1.10 - 2.90)	0.018879		1.21 (0.37 - 3.95)	0.753326	0.968654		0.0195	NA	NA	NA	NA
	Esophageal cancer	FinnGen	12	24.7608	0.00988033	1.19 (0.46 - 3.04)	0.72061		0.80 (0.33 - 1.95)	0.62521		0.39 (0.04 - 3.83)	0.440823	0.321622		0.013	1	0.91 (0.41 - 2.05)	0.830765	0.133167
	Esophageal cancer	Meta-analysis	NA	NA	NA	1.19 (0.80 - 1.76)	0.383706		1.49 (0.97 - 2.28)	0.0671307		0.95 (0.33 - 2.72)	0.92613	NA		NA	NA	NA	NA	NA
	Gastric ulcer	UK Biobank	14	17.824	0.164315	1.05 (0.92 - 1.19)	0.488263		0.99 (0.86 - 1.16)	0.94643		0.97 (0.67 - 1.41)	0.870478	0.669386		0.169833	NA	NA	NA	NA
	Gastric ulcer	FinnGen	12	13.306	0.273797	0.88 (0.71 - 1.09)	0.226782		0.82 (0.62 - 1.09)	0.172805		0.79 (0.46 - 1.35)	0.399778	0.670853		0.299	NA	NA	NA	NA
	Gastric ulcer	Meta-analysis	NA	NA	NA	1.00 (0.90 - 1.12)	0.971639		0.95 (0.83 - 1.08)	0.445858		0.91 (0.67 - 1.23)	0.535279	NA		NA	NA	NA	NA	NA
	Duodenal ulcer	UK Biobank	14	23.4564	0.0365143	1.10 (0.70 - 1.75)	0.694017		1.09 (0.66 - 1.79)	0.730426		1.16 (0.41 - 3.28)	0.787012	0.911306		0.0548333	NA	NA	NA	NA
	Duodenal ulcer	FinnGen	11	6.62389	0.760411	0.97 (0.75 - 1.26)	0.809231		0.89 (0.64 - 1.25)	0.509671		0.79 (0.43 - 1.46)	0.475973	0.496474		0.779167	NA	NA	NA	NA
	Duodenal ulcer	Meta-analysis	NA	NA	NA	1.00 (0.80 - 1.25)	0.999505		0.95 (0.72 - 1.25)	0.705421		0.87 (0.51 - 1.48)	0.610146	NA		NA	NA	NA	NA	NA
	Acute gastritis	UK Biobank	14	5.79685	0.953235	1.47 (1.03 - 2.09)	0.032118		1.55 (0.97 - 2.46)	0.0664206		1.59 (0.74 - 3.40)	0.259084	0.829008		0.956167	NA	NA	NA	NA
	Acute gastritis	FinnGen	12	6.12111	0.865162	0.90 (0.66 - 1.21)	0.478596		1.03 (0.69 - 1.54)	0.889205		1.17 (0.56 - 2.45)	0.67735	0.446045		0.868	NA	NA	NA	NA
	Acute gastritis	Meta-analysis	NA	NA	NA	1.14 (0.71 - 1.84)	0.59278		1.23 (0.90 - 1.66)	0.188465		1.36 (0.80 - 2.31)	0.259014	NA		NA	NA	NA	NA	NA
	Chronic gastritis	UK Biobank	14	20.1801	0.0908089	0.71 (0.54 - 0.94)	0.0162611		0.69 (0.49 - 0.97)	0.0314601		0.82 (0.40 - 1.68)	0.593707	0.682465		0.112667	NA	NA	NA	NA
	Chronic gastritis	FinnGen	12	20.514	0.0387701	0.96 (0.78 - 1.19)	0.733669		0.96 (0.76 - 1.22)	0.75143		0.85 (0.50 - 1.45)	0.564112	0.623874		0.0425	NA	NA	NA	NA
	Chronic gastritis	Meta-analysis	NA	NA	NA	0.84 (0.62 - 1.12)	0.236591		0.86 (0.71 - 1.05)	0.135905		0.84 (0.55 - 1.29)	0.421668	NA		NA	NA	NA	NA	NA
	Gastric cancer	UK Biobank	13	5.58817	0.935404	0.98 (0.82 - 1.17)	0.828202		0.96 (0.77 - 1.21)	0.746519		0.95 (0.55 - 1.63)	0.85353	0.902664		0.9225	NA	NA	NA	NA
	Gastric cancer	FinnGen	12	17.6861	0.0891562	0.80 (0.47 - 1.34)	0.393406		0.90 (0.50 - 1.62)	0.719808		0.99 (0.27 - 3.67)	0.985751	0.732952		0.102833	NA	NA	NA	NA
	Gastric cancer	Meta-analysis	NA	NA	NA	0.96 (0.81 - 1.14)	0.631776		0.95 (0.77, 1.18)	0.648001		0.96 (0.58 - 1.58)	0.859773	NA		NA	NA	NA	NA	NA
	Irritable bowel syndrome	UK Biobank	14	23.5604	0.0354228	1.00 (1.00 - 1.00)	0.889783		1.00 (0.99 - 1.00)	0.440663		1.00 (1.00 - 1.00)	0.38739	0.302626		0.047	NA	NA	NA	NA
	Irritable bowel syndrome	FinnGen	12	18.4998	0.0706856	0.91 (0.74 - 1.11)	0.351286		1.16 (0.71 - 1.88)	0.188458		0.87 (0.70 - 1.07)	0.570109	0.309105		0.09	NA	NA	NA	NA
	Irritable bowel syndrome	Meta-analysis	NA	NA	NA	0.91 (0.74 - 1.11)	0.361881		1.00 (1.00 - 1.01)	0.99508		0.87 (0.70 - 1.07)	0.198267	NA		NA	NA	NA	NA	NA
	Celiac disease	UK Biobank	14	22.4095	0.0493323	0.99 (0.98 - 1.00)	0.166178		0.99 (0.97 - 1.00)	0.126631		1.00 (0.97 - 1.02)	0.74372	0.707889		0.0775	NA	NA	NA	NA
	Celiac disease	FinnGen	12	10.5665	0.480263	0.72 (0.56 - 0.92)	0.00874745		0.67 (0.47 - 0.94)	0.0196359		0.65 (0.36 - 1.20)	0.19819	0.736155		0.530667	NA	NA	NA	NA
	Celiac disease	Meta-analysis	NA	NA	NA	0.87 (0.64 - 1.18)	0.359283		0.85 (0.58 - 1.23)	0.386991		1.00 (0.97 - 1.02)	0.953349	NA		NA	NA	NA	NA	NA
	Diverticular disease	UK Biobank	14	11.8824	0.537309	1.00 (1.00 - 1.00)	0.728676		1.00 (1.00 - 1.00)	0.636161		1.00 (1.00 - 1.00)	0.150581	0.147999		0.561667	NA	NA	NA	NA
	Diverticular disease	FinnGen	12	20.6642	0.0370222	1.04 (0.92 - 1.18)	0.544684		0.97 (0.86 - 1.10)	0.660649		0.96 (0.70 - 1.32)	0.809996	0.60272		0.0415	1	0.99 (0.92 - 1.06)	0.768635	0.0948333
	Diverticular disease	Meta-analysis	NA	NA	NA	1.04 (0.92 - 1.18)	0.536768		0.97 (0.86 - 1.10)	0.627603		0.96 (0.70 - 1.32)	0.800825	NA		NA	NA	NA	NA	NA
	Crohn's disease	UK Biobank	14	12.6194	0.477622	0.92 (0.64 - 1.33)	0.657541		1.39 (0.84 - 2.30)	0.198836		1.94 (0.88 - 4.29)	0.128792	0.0609162		0.408	NA	NA	NA	NA
	Crohn's disease	FinnGen	12	6.05788	0.869475	0.97 (0.70 - 1.36)	0.873683		1.02 (0.66 - 1.59)	0.91706		1.49 (0.67 - 3.32)	0.354153	0.281285		0.870833	NA	NA	NA	NA
	Crohn's disease	Meta-analysis	NA	NA	NA	0.95 (0.74 - 1.21)	0.664666		1.17 (0.84 - 1.62)	0.363201		1.70 (0.97 - 2.99)	0.0639412	NA		NA	NA	NA	NA	NA
	Ulcerative colitis	UK Biobank	14	11.9945	0.528097	1.00 (1.00 - 1.00)	0.678727		1.00 (1.00 - 1.00)	0.295794		1.00 (1.00 - 1.00)	0.786473	0.921844		0.549333	NA	NA	NA	NA
	Ulcerative colitis	FinnGen	12	12.2194	0.347378	1.27 (1.02 - 1.58)	0.0360679		1.24 (0.92 - 1.68)	0.15494		1.44 (0.83 - 2.51)	0.228453	0.633058		0.406	NA	NA	NA	NA
	Ulcerative colitis	Meta-analysis	NA	NA	NA	1.27 (1.02 - 1.58)	0.0322746		1.24 (0.92 - 1.68)	0.161418		1.44 (0.83 - 2.51)	0.196464	NA		NA	NA	NA	NA	NA
	Colorectal cancer	UK Biobank	14	9.14378	0.762	1.08 (0.96 - 1.23)	0.213638		1.08 (0.92 - 1.27)	0.332767		1.09 (0.79 - 1.51)	0.600622	0.948225		0.784333	NA	NA	NA	NA
	Colorectal cancer	FinnGen	12	8.68251	0.651172	1.19 (0.99 - 1.44)	0.0666801		1.12 (0.87 - 1.46)	0.376784		1.01 (0.64 - 1.60)	0.96986	0.450128		0.647667	NA	NA	NA	NA
	Colorectal cancer	Meta-analysis	NA	NA	NA	1.11 (1.00 - 1.23)	0.043459		1.09 (0.95 - 1.25)	0.21205		1.06 (0.82 - 1.38)	0.65245	NA		NA	NA	NA	NA	NA
	Non-alcoholic fatty liver disease	UK Biobank	14	29.1674	0.00619719	1.32 (0.99 - 1.75)	0.0587291		1.22 (0.90 - 1.66)	0.198055		2.15 (1.25 - 3.72)	0.0173781	0.0678502		0.01	2	1.16 (0.89 - 1.50)	0.289192	0.0316667
	Non-alcoholic fatty liver disease	FinnGen	12	10.9147	0.450436	0.87 (0.64 - 1.19)	0.376296		0.77 (0.50 - 1.19)	0.235851		1.90 (0.90 - 4.03)	0.123284	0.0480954		0.4595	NA	NA	NA	NA
	Non-alcoholic fatty liver disease	Meta-analysis	NA	NA	NA	1.08 (0.72 - 1.62)	0.722942		1.00 (0.64, 1.56)	0.983961		2.06 (1.33 - 3.20)	0.00131681	NA		NA	NA	NA	NA	NA
	Alcoholic liver disease	UK Biobank	14	25.5452	0.019554	1.34 (0.75 - 2.39)	0.316736		1.89 (0.97 - 3.66)	0.0597861		3.59 (1.16 - 11.16)	0.0471921	0.0789434		0.0196667	1	0.87 (0.49 - 1.52)	0.628711	0.0988333
	Alcoholic liver disease	FinnGen	12	11.9923	0.364219	0.77 (0.57 - 1.03)	0.0809596		0.78 (0.54 - 1.13)	0.195328		0.66 (0.31 - 1.38)	0.292346	0.655191		0.418333	NA	NA	NA	NA
	Alcoholic liver disease	Meta-analysis	NA	NA	NA	0.96 (0.56 - 1.63)	0.874784		1.16 (0.49 - 2.75)	0.73456		1.46 (0.28 - 7.63)	0.656607	NA		NA	NA	NA	NA	NA
	Cirrhosis	UK Biobank	14	28.3106	0.00818853	1.38 (0.38 - 5.00)	0.621764		0.94 (0.21 - 4.24)	0.93775		29.42 (3.27 - 264.90)	0.0107499	0.00982519		0.00633333	1	0.45 (0.16 - 1.26)	0.154103	0.247667
	Cirrhosis	FinnGen	12	13.2505	0.277267	0.82 (0.62 - 1.09)	0.181974		0.86 (0.62 - 1.20)	0.377071		0.72 (0.35 - 1.47)	0.386169	0.686983		0.3145	NA	NA	NA	NA
	Cirrhosis	Meta-analysis	NA	NA	NA	0.84 (0.64 - 1.11)	0.214201		0.86 (0.63 - 1.19)	0.372516		3.96 (0.11 - 148.28)	0.456978	NA		NA	NA	NA	NA	NA
	Liver cancer	UK Biobank	14	16.368	0.229826	1.56 (1.10 - 2.21)	0.0116954		1.54 (0.99 - 2.38)	0.0548001		3.91 (1.44 - 10.59)	0.0199114	0.0809048		0.279667	NA	NA	NA	NA
	Liver cancer	FinnGen	12	9.03916	0.618278	1.57 (1.00 - 2.44)	0.0480092		1.37 (0.73 - 2.57)	0.331816		4.32 (1.53 - 12.27)	0.0202558	0.0605229		0.551667	NA	NA	NA	NA
	Liver cancer	Meta-analysis	NA	NA	NA	1.56 (1.49 - 1.64)	1.40084e-75		1.48 (1.03 - 2.12)	0.0320552		4.10 (2.00 - 8.43)	0.000122816	NA		NA	NA	NA	NA	NA
	Cholangitis	UK Biobank	14	16.4759	0.224384	1.38 (0.62 - 3.05)	0.426015		1.53 (0.57 - 4.16)	0.401105		3.77 (0.71 - 20.06)	0.146033	0.20945		0.231333	NA	NA	NA	NA
	Cholangitis	FinnGen	12	18.1105	0.0790525	0.87 (0.55 - 1.38)	0.564908		0.76 (0.43 - 1.35)	0.351788		0.34 (0.13 - 0.88)	0.0499912	0.057422		0.0785	NA	NA	NA	NA
	Cholangitis	Meta-analysis	NA	NA	NA	0.98 (0.66 - 1.45)	0.906356		0.90 (0.55 - 1.49)	0.691694		1.02 (0.10 - 10.72)	0.98495	NA		NA	NA	NA	NA	NA
	Cholecystitis	UK Biobank	14	22.4162	0.0492394	0.88 (0.74 - 1.04)	0.138		0.93 (0.75 - 1.14)	0.470579		1.04 (0.70 - 1.54)	0.855812	0.374115		0.058	NA	NA	NA	NA
	Cholecystitis	FinnGen	12	5.41518	0.909406	1.13 (0.90 - 1.42)	0.291255		1.24 (0.91 - 1.68)	0.168574		0.99 (0.57 - 1.71)	0.973968	0.616069		0.909667	NA	NA	NA	NA
	Cholecystitis	Meta-analysis	NA	NA	NA	0.99 (0.77 - 1.26)	0.905358		1.02 (0.86 - 1.21)	0.830082		1.02 (0.74 - 1.41)	0.890628	NA		NA	NA	NA	NA	NA
	Cholelithiasis	UK Biobank	13	15.2145	0.229918	1.03 (0.94 - 1.13)	0.540197		1.00 (0.89 - 1.13)	0.970812		1.06 (0.84 - 1.34)	0.626319	0.787272		0.235667	NA	NA	NA	NA
	Cholelithiasis	FinnGen	11	10.1469	0.427697	0.97 (0.89 - 1.06)	0.556726		1.00 (0.89 - 1.13)	0.977574		0.76 (0.62 - 0.93)	0.0245845	0.0243056		0.395667	NA	NA	NA	NA
	Cholelithiasis	Meta-analysis	NA	NA	NA	1.00 (0.94 - 1.06)	0.950615		1.00 (0.92 - 1.09)	1		0.89 (0.64 - 1.24)	0.495465	NA		NA	NA	NA	NA	NA
	Acute pancreatitis	UK Biobank	14	5.13454	0.972111	1.14 (0.92 - 1.40)	0.2357		1.03 (0.78 - 1.35)	0.844605		1.47 (0.89 - 2.42)	0.160082	0.292577		0.964333	NA	NA	NA	NA
	Acute pancreatitis	FinnGen	12	8.18134	0.696974	1.08 (0.89 - 1.30)	0.438057		1.17 (0.90 - 1.52)	0.245658		1.26 (0.80 - 1.99)	0.347292	0.481483		0.696333	NA	NA	NA	NA
	Acute pancreatitis	Meta-analysis	NA	NA	NA	1.11 (0.96 - 1.27)	0.158328		1.10 (0.91 - 1.33)	0.319708		1.35 (0.96 - 1.89)	0.0798302	NA		NA	NA	NA	NA	NA
	Chronic pancreatitis	UK Biobank	14	23.8889	0.0321674	0.99 (0.63 - 1.57)	0.982145		1.07 (0.66 - 1.76)	0.779194		1.38 (0.43 - 4.37)	0.595859	0.556049		0.0398333	NA	NA	NA	NA
	Chronic pancreatitis	FinnGen	12	13.2505	0.277267	0.82 (0.62 - 1.09)	0.181974		0.86 (0.61 - 1.21)	0.386757		0.72 (0.35 - 1.47)	0.386169	0.686983		0.316667	NA	NA	NA	NA
	Chronic pancreatitis	Meta-analysis	NA	NA	NA	0.86 (0.68 - 1.10)	0.231848		0.92 (0.70 - 1.22)	0.580321		0.86 (0.47 - 1.59)	0.633752	NA		NA	NA	NA	NA	NA
	Pancreatic cancer	UK Biobank	14	24.1903	0.0294243	0.93 (0.58 - 1.49)	0.749726		1.02 (0.62 - 1.69)	0.936742		0.69 (0.21 - 2.23)	0.546542	0.598664		0.0396667	1	1.09 (0.76 - 1.56)	0.642243	0.217
	Pancreatic cancer	FinnGen	12	23.0344	0.0174786	0.83 (0.47 - 1.47)	0.517193		1.15 (0.64 - 2.08)	0.643028		0.52 (0.13 - 2.17)	0.392303	0.502414		0.0211667	1	1.00 (0.64 - 1.57)	0.997464	0.00166667
	Pancreatic cancer	Meta-analysis	NA	NA	NA	0.89 (0.62 - 1.28)	0.52175		1.07 (0.73 - 1.57)	0.718726		0.61 (0.25 - 1.52)	0.290511	NA		NA	NA	NA	NA	NA
	Acute appendicitis	UK Biobank	14	5.58677	0.959909	1.07 (0.82 - 1.39)	0.611036		1.12 (0.77 - 1.63)	0.546128		1.06 (0.60 - 1.88)	0.844708	0.970036		0.968	NA	NA	NA	NA
	Acute appendicitis	FinnGen	12	10.1958	0.512869	1.02 (0.93 - 1.11)	0.745025		1.03 (0.91 - 1.16)	0.637694		1.03 (0.83 - 1.29)	0.795599	0.886871		0.526167	NA	NA	NA	NA
	Acute appendicitis	Meta-analysis	NA	NA	NA	1.02 (0.94 - 1.11)	0.564801		1.04 (0.92 - 1.17)	0.524399		1.03 (0.84 - 1.27)	0.751121	NA		NA	NA	NA	NA	NA
	OR, odd ratio; CI, condifence interval; IVW, inverse variance weighted; MR, Mendelian randomization; MR-PRESSO, Mendelian Randomization Pleiotropy RESidual Sum and Outlier;
	*Estimates with P<0.05 in IVW method are reported in bold.
	†Outlier-corrected estimate. NA, not available (if no outliers were detected).

## Sheet: Table S7
	Table S7. Associations of genetically-predicted transferrin saturation with gastrointestinal diseases in univaribale Mendelian randomization using different methods*
	Disease	Source	Number of used SNPs		IVW				Weighted median			MR-Egger				MR-PRESSO†
				Cochran's Q	Cochran's Q P value	OR (95%CI)	P value		OR (95%CI)	P value		OR (95%CI)	P value	P intercept		Global test	Outliers	OR (95%CI)	P value	Distortion test
	Gastroesophageal reflux	UK Biobank	12	9.97695	0.532462	1.04 (0.99 - 1.08)	0.10087		1.04 (0.99 - 1.10)	0.103362		1.05 (0.99 - 1.12)	0.120496	0.471523		0.641667	NA	NA	NA	NA
	Gastroesophageal reflux	FinnGen	12	19.1817	0.0579082	1.01 (0.94 - 1.08)	0.816809		1.01 (0.95 - 1.08)	0.654553		1.02 (0.91 - 1.13)	0.793953	0.875248		0.126	NA	NA	NA	NA
	Gastroesophageal reflux	Meta-analysis	NA	NA	NA	1.03 (0.99 - 1.07)	0.0996791		1.03 (0.99 - 1.07)	0.186636		1.04 (0.99 - 1.10)	0.127423	NA		NA	NA	NA	NA	NA
	Esophageal cancer	UK Biobank	12	9.26482	0.597462	0.80 (0.67 - 0.95)	0.0130708		0.82 (0.65 - 1.02)	0.0743825		0.84 (0.64 - 1.10)	0.242089	0.633227		0.6865	NA	NA	NA	NA
	Esophageal cancer	FinnGen	12	8.29603	0.686566	1.00 (0.70 - 1.42)	0.999254		1.03 (0.65 - 1.63)	0.89949		1.08 (0.64 - 1.82)	0.788596	0.717842		0.74	NA	NA	NA	NA
	Esophageal cancer	Meta-analysis	NA	NA	NA	0.84 (0.71 - 0.98)	0.0246883		0.86 (0.70 - 1.05)	0.134958		0.89 (0.70 - 1.13)	0.323338	NA		NA	NA	NA	NA	NA
	Gastric ulcer	UK Biobank	12	12.5487	0.323845	1.01 (0.94 - 1.08)	0.888111		1.02 (0.94 - 1.12)	0.571001		0.98 (0.87 - 1.11)	0.783078	0.646084		0.394667	NA	NA	NA	NA
	Gastric ulcer	FinnGen	12	11.6	0.394451	1.00 (0.90 - 1.12)	0.935185		0.96 (0.83 - 1.11)	0.567309		0.95 (0.80 - 1.12)	0.567273	0.400874		0.445	NA	NA	NA	NA
	Gastric ulcer	Meta-analysis	NA	NA	NA	1.01 (0.95 - 1.07)	0.812514		1.00 (0.93 - 1.08)	0.924077		0.97 (0.88 - 1.07)	0.539374	NA		NA	NA	NA	NA	NA
	Duodenal ulcer	UK Biobank	12	5.9726	0.875186	1.02 (0.85 - 1.21)	0.857304		1.05 (0.85 - 1.28)	0.668681		1.04 (0.82 - 1.33)	0.747238	0.775796		0.904667	NA	NA	NA	NA
	Duodenal ulcer	FinnGen	12	6.08722	0.867481	1.05 (0.91 - 1.21)	0.473716		1.01 (0.85 - 1.20)	0.922734		1.00 (0.81 - 1.23)	0.980585	0.504201		0.882167	NA	NA	NA	NA
	Duodenal ulcer	Meta-analysis	NA	NA	NA	1.04 (0.93 - 1.16)	0.508976		1.03 (0.90 - 1.17)	0.698391		1.02 (0.87 - 1.19)	0.835385	NA		NA	NA	NA	NA	NA
	Acute gastritis	UK Biobank	12	14.7957	0.192043	1.14 (0.92 - 1.41)	0.219571		1.25 (1.02 - 1.52)	0.029031		1.40 (1.09 - 1.79)	0.0246782	0.0413093		0.278	NA	NA	NA	NA
	Acute gastritis	FinnGen	12	14.5889	0.202101	1.01 (0.83 - 1.24)	0.883022		1.07 (0.86 - 1.33)	0.533806		1.14 (0.86 - 1.53)	0.378562	0.290605		0.291167	NA	NA	NA	NA
	Acute gastritis	Meta-analysis	NA	NA	NA	1.07 (0.92 - 1.24)	0.370891		1.16 (1.01 - 1.35)	0.042514		1.28 (1.06 - 1.55)	0.00941143	NA		NA	NA	NA	NA	NA
	Chronic gastritis	UK Biobank	12	8.79618	0.6407	0.98 (0.86 - 1.11)	0.73782		0.99 (0.82 - 1.19)	0.890416		0.95 (0.78 - 1.15)	0.592377	0.66747		0.5855	NA	NA	NA	NA
	Chronic gastritis	FinnGen	12	18.2365	0.0762519	0.96 (0.86 - 1.07)	0.465809		0.89 (0.78 - 1.01)	0.0687604		0.92 (0.78 - 1.09)	0.364296	0.537247		0.146667	NA	NA	NA	NA
	Chronic gastritis	Meta-analysis	NA	NA	NA	0.97 (0.89 - 1.05)	0.448328		0.92 (0.83 - 1.02)	0.130362		0.93 (0.82 - 1.06)	0.281043	NA		NA	NA	NA	NA	NA
	Gastric cancer	UK Biobank	12	17.2732	0.10005	0.91 (0.79 - 1.04)	0.170985		0.89 (0.78 - 1.02)	0.0989177		0.88 (0.68 - 1.14)	0.363212	0.792073		0.19	NA	NA	NA	NA
	Gastric cancer	FinnGen	12	8.51823	0.666266	0.97 (0.77 - 1.22)	0.767429		0.92 (0.70 - 1.20)	0.770722		0.95 (0.67 - 1.34)	0.770722	0.895363		0.743667	NA	NA	NA	NA
	Gastric cancer	Meta-analysis	NA	NA	NA	0.93 (0.82 - 1.04)	0.19796		0.90 (0.79 - 1.01)	0.0727065		0.90 (0.74 - 1.11)	0.341634	NA		NA	NA	NA	NA	NA
	Irritable bowel syndrome	UK Biobank	12	8.03172	0.71046	1.00 (1.00 - 1.00)	0.466668		1.00 (1.00 - 1.00)	0.998959		1.00 (1.00 - 1.00)	0.782242	0.268496		0.518	NA	NA	NA	NA
	Irritable bowel syndrome	FinnGen	12	10.8991	0.451759	0.95 (0.87 - 1.03)	0.219249		0.92 (0.82 - 1.03)	0.165604		0.89 (0.79 - 1.02)	0.117604	0.25908		0.492333	NA	NA	NA	NA
	Irritable bowel syndrome	Meta-analysis	NA	NA	NA	0.95 (0.87 - 1.03)	0.233644		0.92 (0.82 - 1.03)	0.15171		0.89 (0.79 - 1.02)	0.0738177	NA		NA	NA	NA	NA	NA
	Celiac disease	UK Biobank	12	5.59912	0.847745	0.99 (0.99 - 1.00)	0.0192537		0.99 (0.99 - 1.00)	0.0162402		0.99 (0.98 - 1.00)	0.0981349	0.937323		0.841333	NA	NA	NA	NA
	Celiac disease	FinnGen	12	18.3831	0.0731064	0.94 (0.78 - 1.12)	0.471866		0.87 (0.72 - 1.04)	0.125101		0.85 (0.65 - 1.10)	0.244357	0.332573		0.13	NA	NA	NA	NA
	Celiac disease	Meta-analysis	NA	NA	NA	0.99 (0.99 - 0.99)	8.24705e-05		0.99 (0.98 - 0.99)	7.5234e-05		0.99 (0.98 - 1.00)	0.0460284	NA		NA	NA	NA	NA	NA
	Diverticular disease	UK Biobank	12	13.1005	0.286809	1.00 (1.00 - 1.00)	0.94953		1.00 (1.00 - 1.00)	0.778192		1.00 (1.00 - 1.00)	0.761689	0.617887		0.4025	NA	NA	NA	NA
	Diverticular disease	FinnGen	12	29.7159	0.00175575	0.99 (0.91 - 1.08)	0.783046		1.00 (0.93 - 1.08)	0.93835		1.04 (0.92 - 1.18)	0.534197	0.284527		0.0171667	1	1.00 (0.92 - 1.08)	0.966055	0.0391667
	Diverticular disease	Meta-analysis	NA	NA	NA	0.99 (0.91 - 1.08)	0.81807		1.00 (0.93 - 1.08)	1		1.04 (0.92 - 1.18)	0.536768	NA		NA	NA	NA	NA	NA
	Crohn's disease	UK Biobank	12	15.3615	0.16654	1.21 (0.97 - 1.51)	0.0933984		1.22 (0.98 - 1.52)	0.0758963		1.13 (0.82 - 1.54)	0.473299	0.535559		0.295833	NA	NA	NA	NA
	Crohn's disease	FinnGen	12	6.50814	0.837403	1.12 (0.93 - 1.35)	0.223813		1.16 (0.92 - 1.46)	0.210543		1.12 (0.85 - 1.48)	0.425572	0.991332		0.8825	NA	NA	NA	NA
	Crohn's disease	Meta-analysis	NA	NA	NA	1.16 (1.00 - 1.33)	0.0455693		1.19 (1.02 - 1.40)	0.0311455		1.12 (0.91 - 1.38)	0.269776	NA		NA	NA	NA	NA	NA
	Ulcerative colitis	UK Biobank	12	18.0954	0.0793927	1.00 (1.00 - 1.00)	0.595522		1.00 (1.00 - 1.00)	0.201232		1.00 (1.00 - 1.00)	0.249922	0.257404		0.175	NA	NA	NA	NA
	Ulcerative colitis	FinnGen	12	12.2289	0.346682	0.97 (0.85 - 1.09)	0.590843		1.05 (0.91 - 1.22)	0.473147		1.12 (0.95 - 1.34)	0.213472	0.0426555		0.344	NA	NA	NA	NA
	Ulcerative colitis	Meta-analysis	NA	NA	NA	0.97 (0.86 - 1.10)	0.631154		1.05 (0.91 - 1.22)	0.514146		1.12 (0.95 - 1.34)	0.19651	NA		NA	NA	NA	NA	NA
	Colorectal cancer	UK Biobank	12	7.68692	0.741044	1.02 (0.95 - 1.10)	0.533759		1.02 (0.94 - 1.11)	0.619847		1.01 (0.90 - 1.13)	0.872253	0.752983		0.812333	NA	NA	NA	NA
	Colorectal cancer	FinnGen	12	13.7207	0.248838	1.07 (0.95 - 1.20)	0.270032		1.06 (0.93 - 1.22)	0.378038		1.07 (0.89 - 1.29)	0.490167	0.99247		0.3555	NA	NA	NA	NA
	Colorectal cancer	Meta-analysis	NA	NA	NA	1.03 (0.97 - 1.10)	0.292816		1.03 (0.96 - 1.11)	0.402174		1.03 (0.93 - 1.13)	0.603336	NA		NA	NA	NA	NA	NA
	Non-alcoholic fatty liver disease	UK Biobank	12	9.14276	0.608717	1.19 (1.08 - 1.31)	0.000429823		1.26 (1.11 - 1.42)	0.000238236		1.25 (1.10 - 1.43)	0.00715779	0.275829		0.4515	NA	NA	NA	NA
	Non-alcoholic fatty liver disease	FinnGen	12	3.07258	0.989731	1.15 (0.97 - 1.37)	0.112064		1.14 (0.92 - 1.40)	0.227389		1.09 (0.84 - 1.41)	0.542357	0.558901		0.992667	NA	NA	NA	NA
	Non-alcoholic fatty liver disease	Meta-analysis	NA	NA	NA	1.18 (1.08 - 1.28)	0.000114715		1.23 (1.10 - 1.37)	0.000149619		1.22 (1.08 - 1.37)	0.0010796	NA		NA	NA	NA	NA	NA
	Alcoholic liver disease	UK Biobank	12	12.0372	0.360856	1.38 (1.11 - 1.72)	0.00431001		1.42 (1.08 - 1.87)	0.0109392		1.62 (1.21 - 2.16)	0.00876988	0.149254		0.385333	NA	NA	NA	NA
	Alcoholic liver disease	FinnGen	12	22.7169	0.0193719	0.94 (0.75 - 1.18)	0.605652		0.91 (0.74 - 1.11)	0.336932		0.95 (0.67 - 1.36)	0.803151	0.919583		0.0556667	NA	NA	NA	NA
	Alcoholic liver disease	Meta-analysis	NA	NA	NA	1.14 (0.78 - 1.66)	0.494163		1.13 (0.73 - 1.74)	0.59499		1.25 (0.74 - 2.11)	0.397452	NA		NA	NA	NA	NA	NA
	Cirrhosis	UK Biobank	12	19.7195	0.0493391	1.88 (1.03 - 3.45)	0.0404043		3.14 (1.64 - 6.01)	0.000554857		2.17 (0.91 - 5.17)	0.111588	0.655798		0.186167	NA	NA	NA	NA
	Cirrhosis	FinnGen	12	13.9686	0.234739	1.05 (0.89 - 1.24)	0.568308		1.08 (0.90 - 1.29)	0.415767		1.00 (0.77 - 1.28)	0.97659	0.597199		0.311833	NA	NA	NA	NA
	Cirrhosis	Meta-analysis	NA	NA	NA	1.30 (0.75 - 2.26)	0.346969		1.76 (0.62 - 4.98)	0.28939		1.31 (0.64 - 2.71)	0.462678	NA		NA	NA	NA	NA	NA
	Liver cancer	UK Biobank	12	18.7885	0.0649982	1.24 (0.95 - 1.61)	0.114053		1.40 (1.07 - 1.85)	0.0151991		1.83 (1.24 - 2.72)	0.012923	0.0392678		0.0845	NA	NA	NA	NA
	Liver cancer	FinnGen	12	6.07165	0.868541	1.55 (1.21 - 1.98)	0.000434424		1.59 (1.17 - 2.17)	0.00316679		1.53 (1.07 - 2.17)	0.0405431	0.910573		0.862333	NA	NA	NA	NA
	Liver cancer	Meta-analysis	NA	NA	NA	1.40 (1.17 - 1.67)	0.000271855		1.48 (1.21 - 1.82)	0.000173535		1.66 (1.27 - 2.16)	0.000163298	NA		NA	NA	NA	NA	NA
	Cholangitis	UK Biobank	12	5.98794	0.874168	1.42 (0.99 - 2.03)	0.0602673		1.40 (0.92 - 2.13)	0.116723		1.51 (0.92 - 2.49)	0.135842	0.717286		0.917333	NA	NA	NA	NA
	Cholangitis	FinnGen	12	6.4485	0.841828	1.00 (0.82 - 1.22)	0.989114		0.91 (0.76 - 1.38)	0.504676		1.03 (0.76 - 1.38)	0.857072	0.7973		0.7585	NA	NA	NA	NA
	Cholangitis	Meta-analysis	NA	NA	NA	1.15 (0.82 - 1.62)	0.409047		1.10 (0.72 - 1.67)	0.657686		1.14 (0.88 - 1.47)	0.31707	NA		NA	NA	NA	NA	NA
	Cholecystitis	UK Biobank	12	11.0843	0.436225	0.94 (0.87 - 1.00)	0.0612261		0.94 (0.86 - 1.02)	0.15323		0.96 (0.87 - 1.06)	0.439874	0.503471		0.498667	NA	NA	NA	NA
	Cholecystitis	FinnGen	12	14.1965	0.222308	1.03 (0.89 - 1.19)	0.721221		1.06 (0.91 - 1.23)	0.447226		1.09 (0.88 - 1.36)	0.43806	0.455899		0.321333	NA	NA	NA	NA
	Cholecystitis	Meta-analysis	NA	NA	NA	0.96 (0.90 - 1.02)	0.162083		0.97 (0.90 - 1.04)	0.387872		0.98 (0.90 - 1.07)	0.676638	NA		NA	NA	NA	NA	NA
	Cholelithiasis	UK Biobank	12	6.02235	0.871869	1.00 (0.96 - 1.05)	0.942932		1.00 (0.95 - 1.06)	0.988841		1.00 (0.93 - 1.06)	0.853904	0.750993		0.916	NA	NA	NA	NA
	Cholelithiasis	FinnGen	12	30.9754	0.00111148	0.96 (0.89 - 1.04)	0.306034		0.97 (0.91 - 1.03)	0.338912		0.94 (0.83 - 1.06)	0.353385	0.685725		0.0158333	2	0.98 (0.93 - 1.04)	0.562045	0.207
	Cholelithiasis	Meta-analysis	NA	NA	NA	0.99 (0.95 - 1.03)	0.6084		0.99 (0.95 - 1.03)	0.523071		0.99 (0.93 - 1.04)	0.63998	NA		NA	NA	NA	NA	NA
	Acute pancreatitis	UK Biobank	12	14.4908	0.207015	1.02 (0.89 - 1.16)	0.825255		1.13 (0.97 - 1.31)	0.10547		1.15 (0.97 - 1.37)	0.127924	0.0665004		0.259667	NA	NA	NA	NA
	Acute pancreatitis	FinnGen	12	9.94831	0.535042	1.03 (0.92 - 1.14)	0.618769		1.05 (0.92 - 1.20)	0.496842		1.11 (0.95 - 1.30)	0.219086	0.215125		0.564667	NA	NA	NA	NA
	Acute pancreatitis	Meta-analysis	NA	NA	NA	1.03 (0.94 - 1.12)	0.545579		1.08 (0.98 - 1.20)	0.110624		1.13 (1.00 - 1.27)	0.0421181	NA		NA	NA	NA	NA	NA
	Chronic pancreatitis	UK Biobank	12	6.00814	0.872821	1.23 (1.01 - 1.48)	0.0362028		1.26 (1.01 - 1.58)	0.0438255		1.27 (0.96 - 1.68)	0.1286	0.750056		0.915667	NA	NA	NA	NA
	Chronic pancreatitis	FinnGen	12	13.9686	0.234739	1.05 (0.89 - 1.24)	0.568308		1.08 (0.90 - 1.30)	0.42563		1.00 (0.77 - 1.28)	0.97659	0.597199		0.3085	NA	NA	NA	NA
	Chronic pancreatitis	Meta-analysis	NA	NA	NA	1.12 (0.99 - 1.27)	0.0675988		1.15 (1.00 - 1.32)	0.0549502		1.11 (0.92 - 1.34)	0.260332	NA		NA	NA	NA	NA	NA
	Pancreatic cancer	UK Biobank	12	14.3486	0.214298	1.01 (0.81 - 1.26)	0.908196		1.06 (0.84 - 1.34)	0.637799		1.03 (0.73 - 1.44)	0.87689	0.910958		0.2955	NA	NA	NA	NA
	Pancreatic cancer	FinnGen	12	11.0962	0.43524	0.89 (0.71 - 1.12)	0.324987		0.94 (0.69 - 1.28)	0.684194		0.86 (0.61 - 1.22)	0.424583	0.794852		0.411667	NA	NA	NA	NA
	Pancreatic cancer	Meta-analysis	NA	NA	NA	0.95 (0.81 - 1.11)	0.525994		1.01 (0.84 - 1.22)	0.878		0.94 (0.74 - 1.20)	0.634622	NA		NA	NA	NA	NA	NA
	Acute appendicitis	UK Biobank	12	21.3532	0.0298911	1.01 (0.84 - 1.22)	0.907187		0.99 (0.84 - 1.16)	0.879473		0.99 (0.76 - 1.30)	0.955742	0.845059		0.102667	NA	NA	NA	NA
	Acute appendicitis	FinnGen	12	10.2119	0.511434	0.99 (0.94 - 1.04)	0.78383		1.02 (0.97 - 1.12)	0.541556		1.04 (0.97 - 1.12)	0.322591	0.126945		0.512833	NA	NA	NA	NA
	Acute appendicitis	Meta-analysis	NA	NA	NA	0.99 (0.94 - 1.04)	0.727226		1.01 (0.95 - 1.08)	0.65742		1.04 (0.97 - 1.11)	0.310655	NA		NA	NA	NA	NA	NA
	OR, odd ratio; CI, condifence interval; IVW, inverse variance weighted; MR, Mendelian randomization; MR-PRESSO, Mendelian Randomization Pleiotropy RESidual Sum and Outlier;
	*Estimates with P<0.05 in IVW method are reported in bold.
	†Outlier-corrected estimate. NA, not available (if no outliers were detected).

## Sheet: Table S8
	Table S8. Associations of genetically-predicted transferrin with gastrointestinal diseases in univaribale Mendelian randomization using different methods*
	Disease	Source	Number of used SNPs		IVW				Weighted median			MR-Egger				MR-PRESSO†
				Cochran's Q	Cochran's Q P value	OR (95%CI)	P value		OR (95%CI)	P value		OR (95%CI)	P value	P intercept		Global test	Outliers	OR (95%CI)	P value	Distortion test
	Gastroesophageal reflux	UK Biobank	22	22.3151	0.381548	0.97 (0.94 - 1.00)	0.0770103		0.98 (0.94 - 1.02)	0.24335		0.98 (0.94 - 1.03)	0.443651	0.489476		0.455833	NA	NA	NA	NA
	Gastroesophageal reflux	FinnGen	22	26.6271	0.18354	1.02 (0.98 - 1.06)	0.400016		1.02 (0.98 - 1.07)	0.362081		1.03 (0.97 - 1.09)	0.39779	0.695745		0.249667	NA	NA	NA	NA
	Gastroesophageal reflux	Meta-analysis	NA	NA	NA	0.99 (0.95 - 1.04)	0.785227		1.00 (0.97 - 1.03)	0.913528		1.00 (0.96 - 1.04)	0.945182	NA		NA	NA	NA	NA	NA
	Esophageal cancer	UK Biobank	22	20.8911	0.465613	1.11 (0.99 - 1.25)	0.0705763		1.15 (1.00 - 1.32)	0.0464723		1.21 (1.03 - 1.42)	0.0323701	0.166256		0.5405	NA	NA	NA	NA
	Esophageal cancer	FinnGen	22	17.6211	0.672841	1.01 (0.80 - 1.27)	0.956439		1.07 (0.80 - 1.43)	0.653012		0.99 (0.71 - 1.39)	0.974479	0.920891		0.728667	NA	NA	NA	NA
	Esophageal cancer	Meta-analysis	NA	NA	NA	1.09 (0.98 - 1.21)	0.108662		1.13 (1.00 - 1.29)	0.0480027		1.17 (1.01 - 1.35)	0.03805	NA		NA	NA	NA	NA	NA
	Gastric ulcer	UK Biobank	22	35.274	0.0263405	0.97 (0.92 - 1.03)	0.36534		0.99 (0.94 - 1.04)	0.571447		0.97 (0.89 - 1.05)	0.396502	0.745118		0.0906667	NA	NA	NA	NA
	Gastric ulcer	FinnGen	22	18.0813	0.643852	1.03 (0.95 - 1.10)	0.487538		1.01 (0.92 - 1.11)	0.812675		0.98 (0.89 - 1.09)	0.761754	0.271199		0.682333	NA	NA	NA	NA
	Gastric ulcer	Meta-analysis	NA	NA	NA	0.99 (0.95 - 1.04)	0.72248		0.99 (0.95 - 1.04)	0.806755		0.97 (0.91 - 1.04)	0.419897	NA		NA	NA	NA	NA	NA
	Duodenal ulcer	UK Biobank	22	19.9442	0.5248	0.93 (0.82 - 1.06)	0.302519		0.96 (0.82 - 1.13)	0.635672		0.97 (0.81 - 1.16)	0.754494	0.529417		0.593833	NA	NA	NA	NA
	Duodenal ulcer	FinnGen	22	31.7035	0.0627212	1.02 (0.91 - 1.15)	0.695097		1.01 (0.90 - 1.13)	0.891494		0.96 (0.81 - 1.12)	0.590892	0.255199		0.112667	NA	NA	NA	NA
	Duodenal ulcer	Meta-analysis	NA	NA	NA	0.98 (0.90 - 1.07)	0.615984		0.99 (0.90 - 1.09)	0.881518		0.96 (0.86 - 1.09)	0.555625	NA		NA	NA	NA	NA	NA
	Acute gastritis	UK Biobank	22	16.2044	0.758061	0.92 (0.80 - 1.05)	0.210941		0.95 (0.79 - 1.15)	0.61823		0.90 (0.75 - 1.08)	0.27945	0.774025		0.769333	NA	NA	NA	NA
	Acute gastritis	FinnGen	22	27.8069	0.145714	1.01 (0.88 - 1.15)	0.915176		1.05 (0.91 - 1.21)	0.536016		1.02 (0.84 - 1.24)	0.825214	0.833785		0.223667	NA	NA	NA	NA
	Acute gastritis	Meta-analysis	NA	NA	NA	0.96 (0.88 - 1.06)	0.459807		1.01 (0.90 - 1.13)	0.832877		0.95 (0.84 - 1.09)	0.48982	NA		NA	NA	NA	NA	NA
	Chronic gastritis	UK Biobank	22	12.0856	0.937279	1.01 (0.93 - 1.11)	0.737826		0.93 (0.83 - 1.04)	0.202038		0.98 (0.87 - 1.10)	0.720452	0.401698		0.722	NA	NA	NA	NA
	Chronic gastritis	FinnGen	22	27.6583	0.15011	1.01 (0.95 - 1.08)	0.745537		0.96 (0.88 - 1.04)	0.31028		1.03 (0.93 - 1.13)	0.59206	0.656115		0.182167	NA	NA	NA	NA
	Chronic gastritis	Meta-analysis	NA	NA	NA	1.01 (0.96 - 1.06)	0.707198		0.95 (0.89 - 1.02)	0.1284		1.01 (0.94 - 1.09)	0.808815	NA		NA	NA	NA	NA	NA
	Gastric cancer	UK Biobank	21	25.6296	0.178395	0.96 (0.89 - 1.04)	0.325193		0.95 (0.88 - 1.03)	0.210097		0.98 (0.88 - 1.09)	0.685029	0.686141		0.315333	NA	NA	NA	NA
	Gastric cancer	FinnGen	22	36.1831	0.0208521	0.89 (0.73 - 1.09)	0.278956		0.96 (0.79 - 1.17)	0.715147		0.93 (0.70 - 1.25)	0.647873	0.689173		0.041	NA	NA	NA	NA
	Gastric cancer	Meta-analysis	NA	NA	NA	0.95 (0.88 - 1.02)	0.170584		0.95 (0.88 - 1.02)	0.181092		0.97 (0.88 - 1.08)	0.605124	NA		NA	NA	NA	NA	NA
	Irritable bowel syndrome	UK Biobank	22	18.4174	0.622459	1.00 (1.00 - 1.00)	0.936207		1.00 (1.00 - 1.00)	0.795418		1.00 (1.00 - 1.00)	0.453999	0.316225		0.682167	NA	NA	NA	NA
	Irritable bowel syndrome	FinnGen	22	27.5167	0.154398	1.02 (0.95 - 1.09)	0.622879		0.98 (0.91 - 1.06)	0.631834		0.97 (0.88 - 1.06)	0.499411	0.153905		0.175667	NA	NA	NA	NA
	Irritable bowel syndrome	Meta-analysis	NA	NA	NA	1.02 (0.95 - 1.09)	0.572295		0.98 (0.91 - 1.06)	0.603734		0.97 (0.88 - 1.06)	0.521144	NA		NA	NA	NA	NA	NA
	Celiac disease	UK Biobank	20	37.8	0.00629215	1.00 (1.00 - 1.00)	0.303533		1.01 (1.00 - 1.01)	0.079434		1.01 (1.00 - 1.01)	0.26605	0.551356		0.0376667	1	1.00 (1.00 - 1.01)	0.161627	0.867667
	Celiac disease	FinnGen	20	25.2409	0.152766	1.08 (0.97 - 1.20)	0.150909		1.02 (0.90 - 1.15)	0.747926		1.05 (0.90 - 1.23)	0.541347	0.594576		0.194	NA	NA	NA	NA
	Celiac disease	Meta-analysis	NA	NA	NA	1.08 (0.97 - 1.20)	0.15624		1.01 (1.01 - 1.02)	8.50806e-05		1.01 (1.01 - 1.02)	8.23329e-05	NA		NA	NA	NA	NA	NA
	Diverticular disease	UK Biobank	22	28.5591	0.124995	1.00 (1.00 - 1.00)	0.575051		1.00 (1.00 - 1.00)	0.539352		1.00 (1.00 - 1.00)	0.760355	0.898183		0.185667	NA	NA	NA	NA
	Diverticular disease	FinnGen	22	35.6381	0.0240016	1.02 (0.98 - 1.07)	0.337841		1.01 (0.96 - 1.05)	0.750196		1.01 (0.95 - 1.08)	0.727618	0.662826		0.0661667	NA	NA	NA	NA
	Diverticular disease	Meta-analysis	NA	NA	NA	1.02 (0.98 - 1.07)	0.376961		1.01 (0.96 - 1.05)	0.663368		1.01 (0.95 - 1.08)	0.761033	NA		NA	NA	NA	NA	NA
	Crohn's disease	UK Biobank	22	45.7861	0.00136415	1.04 (0.85 - 1.28)	0.681632		1.26 (1.02 - 1.56)	0.035575		1.10 (0.83 - 1.46)	0.523385	0.60885		0.0215	2	0.91 (0.72 - 1.16)	0.464277	0.2975
	Crohn's disease	FinnGen	22	28.4105	0.128888	1.01 (0.87 - 1.16)	0.932929		0.95 (0.81 - 1.10)	0.474046		0.92 (0.75 - 1.13)	0.431477	0.235742		0.170833	NA	NA	NA	NA
	Crohn's disease	Meta-analysis	NA	NA	NA	1.02 (0.91 - 1.15)	0.743771		1.08 (0.82 - 1.43)	0.570523		0.98 (0.83 - 1.16)	0.797359	NA		NA	NA	NA	NA	NA
	Ulcerative colitis	UK Biobank	21	39.8828	0.00516855	1.00 (1.00 - 1.00)	0.662964		1.00 (1.00 - 1.00)	0.544988		1.00 (1.00 - 1.00)	0.481907	0.56156		0.0208333	1	1.00 (1.00 - 1.00)	0.839833	0.2635
	Ulcerative colitis	FinnGen	20	23.4782	0.216934	1.03 (0.94 - 1.13)	0.484034		1.02 (0.93 - 1.13)	0.6495		1.01 (0.89 - 1.14)	0.930606	0.570239		0.309667	NA	NA	NA	NA
	Ulcerative colitis	Meta-analysis	NA	NA	NA	1.03 (0.94 - 1.13)	0.529079		1.02 (0.93 - 1.13)	0.69025		1.01 (0.89 - 1.14)	0.874805	NA		NA	NA	NA	NA	NA
	Colorectal cancer	UK Biobank	21	24.9823	0.202111	0.98 (0.93 - 1.04)	0.575736		1.00 (0.94 - 1.05)	0.924767		1.03 (0.96 - 1.11)	0.434191	0.089868		0.275	NA	NA	NA	NA
	Colorectal cancer	FinnGen	22	41.6093	0.00470982	0.99 (0.90 - 1.10)	0.862721		1.01 (0.93 - 1.10)	0.773661		1.03 (0.90 - 1.19)	0.667073	0.438864		0.021	2	1.02 (0.96 - 1.09)	0.502141	0.289333
	Colorectal cancer	Meta-analysis	NA	NA	NA	0.98 (0.94 - 1.03)	0.474975		1.00 (0.96 - 1.05)	0.89825		1.03 (0.97 - 1.10)	0.368397	NA		NA	NA	NA	NA	NA
	Non-alcoholic fatty liver disease	UK Biobank	22	22.8936	0.34968	0.91 (0.84 - 0.98)	0.0101215		0.99 (0.88 - 1.12)	0.886045		0.90 (0.81 - 1.00)	0.0729817	0.935634		0.242667	NA	NA	NA	NA
	Non-alcoholic fatty liver disease	FinnGen	22	20.4137	0.495209	0.90 (0.80 - 1.01)	0.0637998		0.89 (0.76 - 1.03)	0.10345		0.81 (0.69 - 0.95)	0.020093	0.1012		0.587	NA	NA	NA	NA
	Non-alcoholic fatty liver disease	Meta-analysis	NA	NA	NA	0.91 (0.85 - 0.97)	0.00290323		0.95 (0.86 - 1.04)	0.288283		0.87 (0.80 - 0.95)	0.00222824	NA		NA	NA	NA	NA	NA
	Alcoholic liver disease	UK Biobank	22	27.4245	0.157241	0.87 (0.73 - 1.05)	0.140313		0.94 (0.75 - 1.17)	0.563682		0.77 (0.61 - 0.97)	0.0399545	0.128825		0.1775	NA	NA	NA	NA
	Alcoholic liver disease	FinnGen	22	17.8474	0.658642	0.96 (0.86 - 1.07)	0.438245		0.97 (0.85 - 1.10)	0.622554		1.02 (0.88 - 1.19)	0.775941	0.249997		0.710667	NA	NA	NA	NA
	Alcoholic liver disease	Meta-analysis	NA	NA	NA	0.94 (0.85 - 1.03)	0.161087		0.96 (0.86 - 1.08)	0.500173		0.90 (0.68 - 1.18)	0.446665	NA		NA	NA	NA	NA	NA
	Cirrhosis	UK Biobank	22	32.4662	0.0524813	0.68 (0.45 - 1.02)	0.0628473		0.73 (0.44 - 1.20)	0.213282		0.44 (0.27 - 0.74)	0.00544341	0.028264		0.096	NA	NA	NA	NA
	Cirrhosis	FinnGen	22	26.2585	0.196763	0.96 (0.86 - 1.07)	0.45395		0.98 (0.87 - 1.11)	0.775609		1.00 (0.85 - 1.17)	0.977868	0.491054		0.2715	NA	NA	NA	NA
	Cirrhosis	Meta-analysis	NA	NA	NA	0.94 (0.84 - 1.04)	0.340422		0.96 (0.86 - 1.09)	0.544492		0.69 (0.31 - 1.53)	0.360042	NA		NA	NA	NA	NA	NA
	Liver cancer	UK Biobank	22	30.6667	0.079387	1.05 (0.91 - 1.22)	0.497398		1.14 (0.99 - 1.32)	0.0612532		1.11 (0.90 - 1.37)	0.349634	0.501317		0.182333	NA	NA	NA	NA
	Liver cancer	FinnGen	22	21.8462	0.408418	0.89 (0.75 - 1.06)	0.197502		0.97 (0.78 - 1.22)	0.820297		0.81 (0.64 - 1.03)	0.0966958	0.257989		0.387667	NA	NA	NA	NA
	Liver cancer	Meta-analysis	NA	NA	NA	0.98 (0.88 - 1.10)	0.721877		1.09 (0.96 - 1.23)	0.174695		0.95 (0.70 - 1.30)	0.760344	NA		NA	NA	NA	NA	NA
	Cholangitis	UK Biobank	22	16.6439	0.732454	0.92 (0.70 - 1.20)	0.541386		0.86 (0.61 - 1.21)	0.385724		0.76 (0.53 - 1.10)	0.166845	0.163337		0.713167	NA	NA	NA	NA
	Cholangitis	FinnGen	21	25.1923	0.194174	1.09 (0.94 - 1.27)	0.273484		1.07 (0.90 - 1.27)	0.439621		1.11 (0.89 - 1.38)	0.36217	0.805757		0.288333	NA	NA	NA	NA
	Cholangitis	Meta-analysis	NA	NA	NA	1.05 (0.92 - 1.19)	0.493521		1.02 (0.88 - 1.19)	0.763946		0.95 (0.66 - 1.36)	0.765694	NA		NA	NA	NA	NA	NA
	Cholecystitis	UK Biobank	22	26.8872	0.174618	1.02 (0.96 - 1.08)	0.496192		1.03 (0.96 - 1.09)	0.422417		1.02 (0.94 - 1.10)	0.648369	0.978069		0.271833	NA	NA	NA	NA
	Cholecystitis	FinnGen	22	21.9846	0.400395	1.02 (0.94 - 1.12)	0.582612		1.04 (0.93 - 1.15)	0.490336		1.00 (0.89 - 1.14)	0.94856	0.658476		0.475667	NA	NA	NA	NA
	Cholecystitis	Meta-analysis	NA	NA	NA	1.02 (0.97 - 1.07)	0.427111		1.03 (0.98 - 1.09)	0.248224		1.01 (0.95 - 1.08)	0.676742	NA		NA	NA	NA	NA	NA
	Cholelithiasis	UK Biobank	21	22.9277	0.292357	1.00 (0.96 - 1.03)	0.806827		1.01 (0.96 - 1.05)	0.693319		1.02 (0.97 - 1.06)	0.504283	0.226469		0.3735	NA	NA	NA	NA
	Cholelithiasis	FinnGen	20	33.1803	0.0229136	1.03 (0.98 - 1.07)	0.217152		0.99 (0.95 - 1.04)	0.806726		1.02 (0.96 - 1.08)	0.621726	0.613366		0.0785	2	0.98 (0.93 - 1.04)	0.562045	0.207
	Cholelithiasis	Meta-analysis	NA	NA	NA	1.01 (0.98 - 1.04)	0.409658		1.00 (0.97 - 1.03)	0.997538		1.02 (0.98 - 1.06)	0.273367	NA		NA	NA	NA	NA	NA
	Acute pancreatitis	UK Biobank	22	35.1875	0.0269255	1.00 (0.90 - 1.11)	0.967307		1.02 (0.91 - 1.14)	0.742895		0.95 (0.82 - 1.10)	0.474524	0.325339		0.066	NA	NA	NA	NA
	Acute pancreatitis	FinnGen	22	32.1223	0.0569021	0.96 (0.87 - 1.04)	0.306647		0.95 (0.88 - 1.04)	0.300623		0.91 (0.80 - 1.03)	0.147118	0.282075		0.111667	NA	NA	NA	NA
	Acute pancreatitis	Meta-analysis	NA	NA	NA	0.98 (0.91 - 1.05)	0.494747		0.97 (0.91 - 1.04)	0.446214		0.93 (0.84 - 1.02)	0.119839	NA		NA	NA	NA	NA	NA
	Chronic pancreatitis	UK Biobank	22	18.4726	0.618931	0.95 (0.84 - 1.09)	0.477067		0.96 (0.81 - 1.14)	0.659542		0.93 (0.78 - 1.12)	0.470185	0.748885		0.633833	NA	NA	NA	NA
	Chronic pancreatitis	FinnGen	22	26.2585	0.196763	0.96 (0.86 - 1.07)	0.45395		0.98 (0.87 - 1.11)	0.778655		1.00 (0.85 - 1.17)	0.977868	0.491054		0.281	NA	NA	NA	NA
	Chronic pancreatitis	Meta-analysis	NA	NA	NA	0.96 (0.88 - 1.04)	0.290456		0.97 (0.88 - 1.07)	0.591611		0.97 (0.86 - 1.09)	0.60271	NA		NA	NA	NA	NA	NA
	Pancreatic cancer	UK Biobank	22	31.9771	0.0588638	1.11 (0.94 - 1.31)	0.226079		1.16 (0.98 - 1.38)	0.0910772		1.24 (0.99 - 1.55)	0.0759869	0.173285		0.117667	NA	NA	NA	NA
	Pancreatic cancer	FinnGen	22	31.9763	0.0588747	1.02 (0.85 - 1.23)	0.807898		0.93 (0.75 - 1.14)	0.470634		1.09 (0.84 - 1.41)	0.54317	0.53222		0.104333	NA	NA	NA	NA
	Pancreatic cancer	Meta-analysis	NA	NA	NA	1.07 (0.94 - 1.21)	0.290347		1.05 (0.84 - 1.30)	0.673031		1.17 (0.99 - 1.39)	0.0644516	NA		NA	NA	NA	NA	NA
	Acute appendicitis	UK Biobank	22	26.701	0.180972	0.96 (0.86 - 1.08)	0.52841		0.89 (0.77 - 1.02)	0.0842281		0.84 (0.73 - 0.96)	0.0204897	0.00841054		0.177833	NA	NA	NA	NA
	Acute appendicitis	FinnGen	22	35.6543	0.0239017	1.02 (0.98 - 1.07)	0.379826		1.01 (0.96 - 1.05)	0.795807		0.97 (0.92 - 1.03)	0.298205	0.021356		0.0493333	1	1.01 (0.97 - 1.05)	0.549776	0.273167
	Acute appendicitis	Meta-analysis	NA	NA	NA	1.01 (0.97 - 1.05)	0.567666		0.97 (0.86 - 1.09)	0.562983		0.92 (0.80 - 1.05)	0.210615	NA		NA	NA	NA	NA	NA
	OR, odd ratio; CI, condifence interval; IVW, inverse variance weighted; MR, Mendelian randomization; MR-PRESSO, Mendelian Randomization Pleiotropy RESidual Sum and Outlier;
	*Estimates with P<0.05 in IVW method are reported in bold.
	†Outlier-corrected estimate. NA, not available (if no outliers were detected).

## Sheet: Table S9
	Table S9. Associations of genetically-predicted spleen iron concent with gastrointestinal diseases in univaribale Mendelian randomization using different methods*
	Disease	Source	Number of used SNPs		IVW				Weighted median			MR-Egger				MR-PRESSO†
				Cochran's Q	Cochran's Q P value	OR (95%CI)	P value		OR (95%CI)	P value		OR (95%CI)	P value	P intercept		Global test	Outliers	OR (95%CI)	P value	Distortion test
	Gastroesophageal reflux	UK Biobank	23	20.0892	0.577461	0.96 (0.89 - 1.03)	0.245139		0.96 (0.86 - 1.08)	0.526768		0.91 (0.75 - 1.09)	0.310785	0.533852		0.6	NA	NA	NA	NA
	Gastroesophageal reflux	FinnGen	19	23.8906	0.158645	0.94 (0.85 - 1.03)	0.178364		0.96 (0.85 - 1.08)	0.524786		0.92 (0.73 - 1.16)	0.481286	0.860863		0.181333	NA	NA	NA	NA
	Gastroesophageal reflux	Meta-analysis	NA	NA	NA	0.95 (0.90 - 1.01)	0.101779		0.96 (0.88 - 1.04)	0.33227		0.91 (0.79 - 1.06)	0.225225	NA		NA	NA	NA	NA	NA
	Esophageal cancer	UK Biobank	23	30.4851	0.107143	1.04 (0.75 - 1.45)	0.807446		0.97 (0.63 - 1.49)	0.895141		0.90 (0.37 - 2.18)	0.820893	0.730999		0.109333	NA	NA	NA	NA
	Esophageal cancer	FinnGen	19	7.00777	0.990061	0.67 (0.39 - 1.15)	0.144729		0.76 (0.37 - 1.55)	0.445541		1.25 (0.35 - 4.39)	0.737408	0.301096		0.988667	NA	NA	NA	NA
	Esophageal cancer	Meta-analysis	NA	NA	NA	0.92 (0.70 - 1.22)	0.577832		0.91 (0.63 - 1.31)	0.613065		1.00 (0.49 - 2.07)	0.993688	NA		NA	NA	NA	NA	NA
	Gastric ulcer	UK Biobank	23	17.6112	0.728774	1.02 (0.92 - 1.14)	0.657177		1.01 (0.88 - 1.17)	0.890185		0.97 (0.74 - 1.27)	0.833529	0.679915		0.769333	NA	NA	NA	NA
	Gastric ulcer	FinnGen	19	26.5701	0.0874194	0.92 (0.75 - 1.13)	0.450171		0.86 (0.67 - 1.10)	0.223601		0.78 (0.48 - 1.26)	0.320929	0.447387		0.0951667	NA	NA	NA	NA
	Gastric ulcer	Meta-analysis	NA	NA	NA	1.00 (0.91 - 1.10)	0.961088		0.97 (0.86 - 1.10)	0.634566		0.92 (0.73 - 1.17)	0.49285	NA		NA	NA	NA	NA	NA
	Duodenal ulcer	UK Biobank	22	11.2277	0.958167	0.86 (0.62 - 1.20)	0.38783		0.86 (0.56 - 1.33)	0.501635		1.18 (0.49 - 2.80)	0.716953	0.458066		0.962667	NA	NA	NA	NA
	Duodenal ulcer	FinnGen	19	9.59487	0.944331	0.93 (0.75 - 1.15)	0.50201		0.93 (0.69 - 1.26)	0.641526		0.91 (0.55 - 1.51)	0.714769	0.926357		0.954833	NA	NA	NA	NA
	Duodenal ulcer	Meta-analysis	NA	NA	NA	0.91 (0.76 - 1.09)	0.295929		0.91 (0.71 - 1.16)	0.436433		0.97 (0.63 - 1.50)	0.896488	NA		NA	NA	NA	NA	NA
	Acute gastritis	UK Biobank	23	19.9376	0.586942	1.08 (0.78 - 1.51)	0.631915		0.91 (0.57 - 1.46)	0.703315		0.75 (0.32 - 1.77)	0.514983	0.37042		0.580333	NA	NA	NA	NA
	Acute gastritis	FinnGen	19	13.5393	0.758594	0.93 (0.72 - 1.22)	0.616739		1.07 (0.74 - 1.55)	0.709896		0.88 (0.48 - 1.64)	0.697548	0.843324		0.783667	NA	NA	NA	NA
	Acute gastritis	Meta-analysis	NA	NA	NA	0.99 (0.80 - 1.21)	0.891318		1.01 (0.75 - 1.35)	0.96881		0.83 (0.51 - 1.37)	0.474052	NA		NA	NA	NA	NA	NA
	Chronic gastritis	UK Biobank	23	11.5924	0.965235	1.01 (0.83 - 1.24)	0.890189		0.99 (0.75 - 1.31)	0.92273		0.98 (0.61 - 1.57)	0.920545	0.863028		0.973	NA	NA	NA	NA
	Chronic gastritis	FinnGen	19	20.8301	0.28807	0.94 (0.82 - 1.09)	0.41696		0.96 (0.79 - 1.17)	0.680474		0.86 (0.61 - 1.21)	0.404252	0.576348		0.274	NA	NA	NA	NA
	Chronic gastritis	Meta-analysis	NA	NA	NA	0.96 (0.86 - 1.08)	0.522844		0.97 (0.83 - 1.14)	0.708534		0.90 (0.68 - 1.19)	0.454352	NA		NA	NA	NA	NA	NA
	Gastric cancer	UK Biobank	23	20.5872	0.546357	0.99 (0.85 - 1.17)	0.933622		1.06 (0.83 - 1.34)	0.65193		1.16 (0.77 - 1.76)	0.478808	0.423557		0.495167	NA	NA	NA	NA
	Gastric cancer	FinnGen	19	25.2	0.119505	0.68 (0.44 - 1.03)	0.0703485		0.82 (0.48 - 1.38)	0.452161		0.64 (0.23 - 1.77)	0.40365	0.907957		0.152667	NA	NA	NA	NA
	Gastric cancer	Meta-analysis	NA	NA	NA	0.87 (0.61 - 1.23)	0.423421		1.01 (0.82 - 1.26)	0.896574		1.07 (0.73 - 1.56)	0.741089	NA		NA	NA	NA	NA	NA
	Irritable bowel syndrome	UK Biobank	23	29.7539	0.124569	1.00 (1.00 - 1.00)	0.477407		1.00 (1.00 - 1.01)	0.397437		1.00 (1.00 - 1.00)	0.277934	0.146798		0.118833	NA	NA	NA	NA
	Irritable bowel syndrome	FinnGen	19	12.9456	0.794796	1.08 (0.94 - 1.23)	0.282821		1.13 (0.94 - 1.35)	0.202771		1.13 (0.83 - 1.56)	0.442415	0.721678		0.816333	NA	NA	NA	NA
	Irritable bowel syndrome	Meta-analysis	NA	NA	NA	1.08 (0.94 - 1.24)	0.261873		1.13 (0.94 - 1.35)	0.185658		1.13 (0.83 - 1.56)	0.447708	NA		NA	NA	NA	NA	NA
	Celiac disease	UK Biobank	23	31.5478	0.0854383	1.01 (1.00 - 1.02)	0.0137624		1.01 (1.00 - 1.02)	0.229388		1.02 (1.00 - 1.04)	0.0429251	0.302187		0.0801667	NA	NA	NA	NA
	Celiac disease	FinnGen	19	22.1307	0.226236	1.10 (0.87 - 1.40)	0.411124		1.19 (0.88 - 1.59)	0.258485		1.94 (1.18 - 3.19)	0.0180219	0.0246777		0.2645	NA	NA	NA	NA
	Celiac disease	Meta-analysis	NA	NA	NA	1.01 (1.00 - 1.02)	0.0454289		1.01 (1.00 - 1.02)	0.0447321		1.02 (1.00 - 1.04)	0.0374693	NA		NA	NA	NA	NA	NA
	Diverticular disease	UK Biobank	23	25.2169	0.286817	1.00 (1.00 - 1.00)	0.919016		1.00 (1.00 - 1.00)	0.719788		1.00 (1.00 - 1.00)	0.633233	0.577938		0.309167	NA	NA	NA	NA
	Diverticular disease	FinnGen	19	35.9607	0.00713826	1.01 (0.90 - 1.13)	0.921317		1.03 (0.91 - 1.15)	0.660249		0.97 (0.74 - 1.27)	0.804853	0.750436		0.0146667	1	0.98 (0.89 - 1.07)	0.666207	0.1815
	Diverticular disease	Meta-analysis	NA	NA	NA	1.01 (0.90 - 1.13)	0.863915		1.03 (0.91 - 1.15)	0.620586		0.97 (0.74 - 1.27)	0.825045	NA		NA	NA	NA	NA	NA
	Crohn's disease	UK Biobank	22	36.7278	0.0180864	0.93 (0.59 - 1.48)	0.77399		1.00 (0.58 - 1.73)	0.994498		1.31 (0.39 - 4.47)	0.666582	0.561378		0.018	1	1.10 (0.75 - 1.60)	0.646104	0.2005
	Crohn's disease	FinnGen	19	18.8569	0.400686	0.82 (0.61 - 1.09)	0.171995		0.75 (0.50 - 1.13)	0.163947		0.61 (0.31 - 1.22)	0.178188	0.374858		0.417333	NA	NA	NA	NA
	Crohn's disease	Meta-analysis	NA	NA	NA	0.85 (0.66 - 1.09)	0.194151		0.83 (0.60 - 1.15)	0.267629		0.73 (0.40 - 1.33)	0.307474	NA		NA	NA	NA	NA	NA
	Ulcerative colitis	UK Biobank	23	27.1155	0.206874	1.00 (1.00 - 1.00)	0.513414		1.00 (1.00 - 1.00)	0.935011		1.00 (1.00 - 1.00)	0.885489	0.677024		0.208833	NA	NA	NA	NA
	Ulcerative colitis	FinnGen	19	29.516	0.0424262	0.85 (0.67 - 1.07)	0.156312		0.93 (0.70 - 1.22)	0.588728		1.15 (0.68 - 1.97)	0.604906	0.223513		0.0456667	NA	NA	NA	NA
	Ulcerative colitis	Meta-analysis	NA	NA	NA	0.85 (0.67 - 1.07)	0.173554		0.93 (0.70 - 1.22)	0.608591		1.15 (0.68 - 1.97)	0.606511	NA		NA	NA	NA	NA	NA
	Colorectal cancer	UK Biobank	23	36.2832	0.0283103	1.08 (0.93 - 1.25)	0.329326		1.06 (0.89 - 1.25)	0.526675		1.13 (0.76 - 1.67)	0.561454	0.813177		0.0405	NA	NA	NA	NA
	Colorectal cancer	FinnGen	19	12.2014	0.836665	1.08 (0.92 - 1.28)	0.331753		1.20 (0.96 - 1.49)	0.106864		1.55 (1.06 - 2.27)	0.0389446	0.0598907		0.834667	NA	NA	NA	NA
	Colorectal cancer	Meta-analysis	NA	NA	NA	1.08 (0.97 - 1.21)	0.170863		1.11 (0.97 - 1.27)	0.126967		1.33 (1.01 - 1.75)	0.0408919	NA		NA	NA	NA	NA	NA
	Non-alcoholic fatty liver disease	UK Biobank	23	22.1424	0.451418	1.07 (0.89 - 1.28)	0.463527		1.04 (0.80 - 1.36)	0.747694		0.59 (0.37 - 0.94)	0.0377656	0.0132031		0.445167	NA	NA	NA	NA
	Non-alcoholic fatty liver disease	FinnGen	19	8.80903	0.964004	0.96 (0.73 - 1.25)	0.750798		0.95 (0.66 - 1.37)	0.7832		1.05 (0.56 - 1.96)	0.888776	0.762591		0.958	NA	NA	NA	NA
	Non-alcoholic fatty liver disease	Meta-analysis	NA	NA	NA	1.03 (0.89 - 1.20)	0.661247		1.01 (0.81 - 1.25)	0.942145		0.72 (0.50 - 1.05)	0.0913329	NA		NA	NA	NA	NA	NA
	Alcoholic liver disease	UK Biobank	23	25.6273	0.268027	0.80 (0.53 - 1.22)	0.299892		0.72 (0.41 - 1.27)	0.259619		1.26 (0.42 - 3.78)	0.685834	0.393921		0.311833	NA	NA	NA	NA
	Alcoholic liver disease	FinnGen	19	12.9914	0.792084	0.85 (0.66 - 1.08)	0.177953		0.83 (0.60 - 1.15)	0.268476		1.09 (0.62 - 1.94)	0.762626	0.342384		0.831833	NA	NA	NA	NA
	Alcoholic liver disease	Meta-analysis	NA	NA	NA	0.84 (0.68 - 1.03)	0.0994739		0.80 (0.60 - 1.06)	0.12328		1.12 (0.68 - 1.86)	0.650681	NA		NA	NA	NA	NA	NA
	Cirrhosis	UK Biobank	22	24.7158	0.259683	0.59 (0.24 - 1.43)	0.240608		0.57 (0.16 - 2.01)	0.385161		1.40 (0.13 - 14.84)	0.784541	0.443934		0.2505	NA	NA	NA	NA
	Cirrhosis	FinnGen	19	13.6928	0.748888	0.87 (0.69 - 1.08)	0.206076		0.87 (0.63 - 1.18)	0.361118		0.81 (0.48 - 1.37)	0.451681	0.802491		0.769833	NA	NA	NA	NA
	Cirrhosis	Meta-analysis	NA	NA	NA	0.85 (0.68 - 1.06)	0.143206		0.85 (0.63 - 1.15)	0.291931		0.83 (0.50 - 1.39)	0.47844	NA		NA	NA	NA	NA	NA
	Liver cancer	UK Biobank	23	11.2554	0.970913	0.96 (0.72 - 1.29)	0.790004		1.02 (0.69 - 1.50)	0.932815		1.13 (0.53 - 2.39)	0.760285	0.659469		0.971833	NA	NA	NA	NA
	Liver cancer	FinnGen	19	8.68759	0.966546	0.94 (0.64 - 1.40)	0.771835		0.89 (0.52 - 1.52)	0.67202		0.84 (0.33 - 2.09)	0.705464	0.776694		0.970833	NA	NA	NA	NA
	Liver cancer	Meta-analysis	NA	NA	NA	0.95 (0.75 - 1.20)	0.685345		0.97 (0.71 - 1.33)	0.865982		1.00 (0.56 - 1.80)	0.990143	NA		NA	NA	NA	NA	NA
	Cholangitis	UK Biobank	22	17.2526	0.695682	0.78 (0.40 - 1.53)	0.469878		0.48 (0.18 - 1.31)	0.152049		0.66 (0.11 - 3.84)	0.648793	0.842889		0.684167	NA	NA	NA	NA
	Cholangitis	FinnGen	19	7.79929	0.981477	0.87 (0.64 - 1.19)	0.38896		0.96 (0.64 - 1.44)	0.828338		1.22 (0.59 - 2.52)	0.596416	0.329689		0.982	NA	NA	NA	NA
	Cholangitis	Meta-analysis	NA	NA	NA	0.85 (0.64 - 1.13)	0.26978		0.87 (0.60 - 1.27)	0.464824		1.12 (0.57 - 2.19)	0.746281	NA		NA	NA	NA	NA	NA
	Cholecystitis	UK Biobank	23	29.3272	0.135754	0.87 (0.75 - 1.00)	0.0439898		0.87 (0.73 - 1.04)	0.136237		0.92 (0.64 - 1.33)	0.66801	0.722548		0.146667	NA	NA	NA	NA
	Cholecystitis	FinnGen	19	11.4651	0.873589	0.99 (0.81 - 1.20)	0.914254		0.98 (0.74 - 1.30)	0.884734		1.17 (0.74 - 1.85)	0.517591	0.445148		0.860833	NA	NA	NA	NA
	Cholecystitis	Meta-analysis	NA	NA	NA	0.91 (0.81 - 1.02)	0.111731		0.90 (0.77 - 1.05)	0.167316		1.01 (0.76 - 1.34)	0.944333	NA		NA	NA	NA	NA	NA
	Cholelithiasis	UK Biobank	23	36.0886	0.0297086	0.96 (0.87 - 1.06)	0.431474		0.98 (0.87 - 1.10)	0.701011		0.99 (0.77 - 1.27)	0.943915	0.80034		0.0321667	1	0.98 (0.90 - 1.06)	0.573214	0.527
	Cholelithiasis	FinnGen	19	29.1095	0.0470573	1.01 (0.92 - 1.10)	0.912279		1.04 (0.92 - 1.17)	0.518934		1.12 (0.90 - 1.38)	0.319676	0.29464		0.042	NA	NA	NA	NA
	Cholelithiasis	Meta-analysis	NA	NA	NA	0.99 (0.92 - 1.05)	0.702762		1.01 (0.93 - 1.10)	0.837534		1.06 (0.90 - 1.25)	0.459846	NA		NA	NA	NA	NA	NA
	Acute pancreatitis	UK Biobank	23	24.8035	0.306562	1.01 (0.82 - 1.24)	0.913926		1.07 (0.81 - 1.41)	0.624682		1.37 (0.83 - 2.27)	0.229653	0.206841		0.352833	NA	NA	NA	NA
	Acute pancreatitis	FinnGen	19	21.6255	0.249036	0.95 (0.79 - 1.13)	0.554949		1.14 (0.89 - 1.45)	0.29549		1.44 (0.98 - 2.11)	0.0794079	0.0298641		0.257167	NA	NA	NA	NA
	Acute pancreatitis	Meta-analysis	NA	NA	NA	0.98 (0.85 - 1.12)	0.716587		1.11 (0.92 - 1.33)	0.268738		1.41 (1.04 - 1.92)	0.0260197	NA		NA	NA	NA	NA	NA
	Chronic pancreatitis	UK Biobank	23	26.709	0.222488	0.92 (0.66 - 1.28)	0.620502		0.90 (0.58 - 1.38)	0.616032		0.84 (0.36 - 1.94)	0.680489	0.811559		0.2355	NA	NA	NA	NA
	Chronic pancreatitis	FinnGen	19	13.6928	0.748888	0.87 (0.69 - 1.08)	0.206076		0.87 (0.63 - 1.18)	0.358973		0.81 (0.48 - 1.37)	0.451681	0.802491		0.7785	NA	NA	NA	NA
	Chronic pancreatitis	Meta-analysis	NA	NA	NA	0.89 (0.74 - 1.07)	0.198531		0.88 (0.68 - 1.13)	0.325095		0.82 (0.52 - 1.28)	0.377197	NA		NA	NA	NA	NA	NA
	Pancreatic cancer	UK Biobank	23	14.8589	0.868223	0.71 (0.52 - 0.98)	0.0368797		0.73 (0.46 - 1.17)	0.189052		0.57 (0.25 - 1.29)	0.190722	0.570537		0.864333	NA	NA	NA	NA
	Pancreatic cancer	FinnGen	19	18.3892	0.430303	0.66 (0.47 - 0.94)	0.0203526		0.72 (0.44 - 1.18)	0.194783		0.90 (0.40 - 2.03)	0.800466	0.434571		0.456	NA	NA	NA	NA
	Pancreatic cancer	Meta-analysis	NA	NA	NA	0.69 (0.54 - 0.87)	0.00163737		0.73 (0.52 - 1.02)	0.0632991		0.72 (0.40 - 1.28)	0.260423	NA		NA	NA	NA	NA	NA
	Acute appendicitis	UK Biobank	22	15.5625	0.793707	0.85 (0.66 - 1.09)	0.19303		0.99 (0.70 - 1.39)	0.952631		0.98 (0.51 - 1.90)	0.960239	0.633013		0.797333	NA	NA	NA	NA
	Acute appendicitis	FinnGen	19	33.2495	0.015567	0.98 (0.88 - 1.09)	0.764758		0.93 (0.82 - 1.04)	0.212193		1.06 (0.82 - 1.36)	0.669347	0.543733		0.0171667	NA	NA	NA	NA
	Acute appendicitis	Meta-analysis	NA	NA	NA	0.96 (0.87 - 1.06)	0.401681		0.94 (0.84 - 1.05)	0.250236		1.05 (0.83 - 1.33)	0.689343	NA		NA	NA	NA	NA	NA
	OR, odd ratio; CI, condifence interval; IVW, inverse variance weighted; MR, Mendelian randomization; MR-PRESSO, Mendelian Randomization Pleiotropy RESidual Sum and Outlier;
	*Estimates with P<0.05 in IVW method are reported in bold.
	†Outlier-corrected estimate. NA, not available (if no outliers were detected).

[truncated: 13 more sheets: Table S10, Table S11, Table S12, Table S13-15, Table S16, Table S17, Table S18, Table S19, Table S20, Table S21, Table S22, Table S23, Table S24]
